# Supplementary material
Source: publisher figshare collection journal article supplement (https://tandf.figshare.com/ndownloader/files/15508385)
Supplement: Supplementary file 1 [file 15508385]

**Supplemental Materials**

**Section 1: Study 1: Using Simulated Data to Compare CFA, Full-ESEM, and Set-ESEM**

- 1.A1: Formal Statistical Basis of ESEM, Identification, Estimation, and Rotation
- 1.A2: Goodness-of-fit, Golden Rules, and Interpretation of Parameter Estimates
- 1.A3: ESEM-within-CFA (EwC)
- 1.A4: A Priori Correlated Uniquenesses and Complex measurement error structures
- 1.B: Design of the simulated data
- 1.C1: Syntax to Create Raw Data From the Population Generating Model
- 1.C2: Syntax for CFA Model 2 (Study 1)
- 1.C3: Syntax for Set-ESEM Target Rotation (Study 1)
- 1.C4: Syntax for Full-ESEM Target Rotation (Study 1)
- 1.C5: Syntax for Set-ESEM Geomin Rotation (Study 1)
- 1.C6: Syntax for Full-ESEM Geomin Rotation (Study 1)

**Section 2: Dimensional Comparison Theory over Six Academic Subjects (Study 2)**

- 2.A: Theoretical Model of the Continuum of Academic Self-Concept Constructs That Varies From Verbal to Math.
- Supplemental Table 2A1. Correlations Among Self-Concepts, Self-Efficacies, Achievements
- Supplemental Table 2A2. Path Coefficients Leading from Achievements to Self-Belief Constructs for CFA and Set-ESEM solutions
- 2.B: Mplus Syntax for Set-ESEM (Study 2)

**Section 3: Multidimensional Indigenous Well-Being Instrument (Study 3)**

- 3.A. Target Factor Loadings for 15 Well-Being Factors (Study 3)
- 3.B: Factor Correlations Among 15 Well-Being Factors for CFA, Set-ESEM and Full-ESEMs (Study 3)
- 3.C: Higher-Order Factors Relating the 15 First-order Factors to Second-order and Third-order (Global) Well-being factors. Comparison of solutions with and without Constraints of Residuals
- 3.D: Mplus Syntax used to test Model B2 in Table 3.1 (also see parameter estimates in Table 3.3)

**Section 4: Section 4. Supplemental Materials Based on the Marsh, Nagengast et al. (2011) Study**

- Figure 5.1. Path Diagrams of CFA, Set-ESEM, and Full-ESEM .
- Figure 5.2. Path Diagrams of CFA and Set-ESEM models of longitudinal data.
- 4A: Factor Structures: Set-ESEM, CFA, and Full-ESEM
- 4.B:13-Model Taxonomy of Invariance Tests
- 4.C: Goodness-of-Fit Indices for 13 Invariance Models: Multigroup (over gender) and Over Time
- 4.D: Multitrait Multimethod Correlations (11 categories based on extension to a three-facet design)
- 4.E: Summary of Multitrait Multimethod Correlations (11 categories based on extension to a three-facet design)
- 4F: Bully and Victim Factors: Relations with Other Constructs
- 4.G: Summary Constructs in Table 2.3 in Main Text (Instrument Reliabilities and Item samples)
- 4.H: Mplus Syntax for Longitudinal Invariance Model 1 (no invariance)
- 4.I: Mplus Syntax for Longitudinal Invariance Model 5 (factor loadings and intercepts invariant)
- 4J: Mplus Syntax for Construct validity Relating 6 Bully/Victim factors to Relevant Factors (172 items, 32 latent factors divided into 11 sets such that the multiple factors from the same instrument were treated as separate sets)

**Section 1: Using Simulated Data to Compare CFA, Full-ESEM, and Set-ESEM (Study 1).**

We begin with path diagrams of a variety of different CFA, Full-ESEM, and Set-ESEM models (see Figure 1 in main text) which are an initial basis of many of the analyses we present with real and simulated data. However, before we explore results based on these models, a number of technical issues need to be addressed in this Section (along with references to further discussion of each).

**Section 1.A1: Formal Statistical Basis of ESEM, Identification, Estimation, and Rotation**

In the ESEM model (Asparouhov & Muthén, 2009; Marsh et al., 2009; for more technical detail, also see http://www.statmodel.com/esem.shtml), there are p dependent variables Y = (Y1, ..., Yp), q independent variables X = (X1, ..., Xq), and m latent variables η = (η1, ..., ηm):

Y = ν + Λη + ΚX + ε (1)

η = α + Βη + ΓX + ζ (2)

Standard assumptions of this model are that the ε and ζ residuals are normally distributed with mean 0 and variance covariance matrix θ and ψ respectively. The first equation represents the measurement model where ν is a vector of intercepts, Λ is a factor loading matrix, η is a vector of continuous latent variables, K is a matrix of Y on X regression coefficients, and ε is a vector of residuals for Y. The second equation represents the latent variable model where α is a vector of latent intercepts, B is a matrix of η on η regression coefficients, Γ is a matrix of η on X regression coefficients, and ζ is a vector of latent variable residuals. The model can be extended to multiple-group analysis, where for each group model (1-2) is estimated and some of the model parameters can be constrained to be invariant over different groups or to include categorical variables and censored variables (Asparouhov & Muthén, 2009). As in CFA, scale of the latent variable is identified either by fixing the variance of latent variables (typically 1) or fixing one of the Λ parameters in each column (typically 1).

In ESEM, η can include multiple sets of ESEM factors defined either as ESEM or CFA factors (noting that in the most basic model with no further constraints, ESEM factors are merely traditional EFA factors). More precisely, the CFA factors are identified as in traditional CFA/SEMs, where each factor is associated with a different set of indicators. Typically, all the ESEM factors are contained within a single block and the indicators of those factors are used to estimate all ESEM factors within the single block. However, it is possible to specify multiple blocks such that distinct sets of indicators are used to estimate factors within each block. For example, suppose the Y1, Y2, …Yc are the indicator variables assigned to an exploratory block, whereas the Yc+1, Yc+2, …Yd are the indicator variables assigned to another exploratory block. This extension of the basic ESEM model is the basis of Set-ESEM considered here. The assignment of items to CFA and/or ESEM factors is usually determined on the basis of a priori theoretical expectations, practical considerations, or, perhaps, post-hoc, based on preliminary tests conducted on the data. The integrative framework provided by ESEM is demonstrated, in that ESEM is appropriate in any combination of ESEM and CFA factors, and is easily extended to accommodate SEMs involving ESEM or CFA factors.

When m (m = number of factors) different ESEM factors (m > 1) are posited, further constraints are required to achieve an identified solution (Asparouhov & Muthén, 2009; Marsh et al., 2009). In an initial unconstrained factor structure a total of m2 constraints are required to achieve identification (Asparouhov & Muthén, 2009; Jöreskog, 1969). These constraints can be achieved by specifying the factor variance-covariance matrix as an identity matrix and constraining factor loadings in the right upper (*m*x*m*) corner of the factor loading matrix to be 0. For any m x m square matrix that we refer to as , one can replace the η vector by in the ESEM model (1-2) which will also alter the parameters in the model as well; Λ to Λ−1, the α vector α, the Γ matrix to Γ, the *B* matrix to and the Ψ matrix to . Since has m2 elements, the ESEM model has a total of m2 indeterminacies that must be resolved. We consider two variations of this model such that factors are either orthogonal (Ψ, the factor variance-covariance matrix, is an identity matrix) or oblique (Ψ is an unrestricted correlation matrix or a structured variance-covariance matrix).

For an orthogonal matrix H (i.e., a square x matrix such that . = I such that the factor variance-covariance matrix, Ψ, is an identity matrix), one can replace the η vector by H η and obtain an equivalent model in which the parameters are changed. EFA can resolve this non-identification problem by minimizing

*f*(Λ*) = *f*(Λ−1) (3)

where *f* is a function called the rotation criteria or simplicity function (Asparouhov & Muthén, 2009; Jennrich & Sampson, 1966), typically such that among all equivalent Λ parameters the simplest solution is obtained. There are a total of m(m−1)/2 constraints in addition to m(m + 1)/2 constraints that are directly imposed on the Ψ matrix for a total of m2 constraints needed to identify the model. The identification for the oblique model is developed similarly by minimizing the simplicity function (3) such that a total of m2 constraints needed to identify the model are imposed (Asparouhov & Muthén, 2009). Asparouhov and Muthén note that the requirement for m2 constraints is only a necessary, but not sufficient, condition to achieve model identification. However, they note that in most cases the model is identified if and only if the Fisher information matrix is not singular (Silvey, 1970). This method can be used in the ESEM framework as well (Asparouhov & Muthén, 2009; also see Hayashi & Marcoulides, 2006).

The estimation of the ESEM model consists of several steps (Asparouhov & Muthén, 2009). In the first step a SEM model is estimated using the ML estimator. The factor variance covariance matrix for each block of factors is specified as an identity matrix (ψ = I), giving m(m + 1)/2 restrictions. The exploratory factor loading matrix for each block has all entries above the main diagonal fixed to 0 (i.e., for the first m rows and the last m columns in the upper right hand corner of factor loading matrix, Λ), providing the remaining m(m − 1)/2 identifying restrictions. This initial unrotated model provides starting values that can be subsequently rotated into an EFA model with m factors using any of a wide variety of different rotation strategies (Asparouhov & Muthén, 2009). The asymptotic distribution of all parameter estimates in this starting value model is also obtained. Then the ESEM (or each block in Set-ESEM) variance covariance matrix is computed (based only on and ignoring the remaining part of the model).

Using the delta method, the correlation matrix is computed as well as the joint asymptotic distribution of the correlation matrix, standardization factors and all remaining parameters in the model and are used to obtain the standardized rotated solution based on the correlation matrix and its asymptotic distribution (Asparouhov & Muthén, 2009). This asymptotic covariance is then used to compute the asymptotic distribution of the optimal rotation matrix and all unrotated parameters which is then used to compute the rotated solution for the model and its asymptotic variance covariance. In Mplus multiple random starting values are used in the estimation process to protect against non-convergence and local minimums in the rotation algorithms.

With ESEM and Set-ESEM models it is possible to constrain the loadings to be equal across two or more sets of EFA blocks in which the different blocks represent multiple discrete groups or multiple occasions for the same group. This is accomplished by first estimating an unrotated solution with all loadings constrained to be equal across the groups or over time. If the starting solutions in the rotation algorithm are the same, and no loading standardizing is used, the optimal rotation matrix will be the same as well as the subsequent rotated solutions. Thus, obtaining a model with invariant rotated Λ* amounts to simply estimating a model with invariant unrotated Λ, a standard task in maximum likelihood estimation.

For an oblique rotation it is also possible to test the invariance of the factor variance-covariance matrix (Ψ) matrix across the groups. To obtain non-invariant Ψs an unrotated solution with Ψ = I is specified in the first group and an unrestricted Ψ is specified in all other groups. Note that this unrestricted specification means that Ψ is not a correlation matrix as factor variances are freely estimated. It is not possible in the ESEM framework to estimate a model where in the subsequent groups the Ψ matrix is an unrestricted correlation matrix, because even if the factor variances are constrained to be 1 in the unrotated solution, they will not be 1 in the rotated solution. However, it is possible to estimate an unrestricted Ψ in all but the first group and after the rotation the rotated Ψ can be constrained to be invariant or varying across groups. Similarly, when the rotated and unrotated loadings are invariant across groups, it is possible to test the invariance of the factor intercept and the structural regression coefficients. These coefficients can also be invariant or varying across groups simply by estimating the invariant or group-varying unrotated model. However, in this framework only full invariance can be tested in relation to parameters in Ψ and Λ in that it is not possible to have measurement invariance for one EFA factor but not for the other EFA factors. Similar restrictions apply to the factor variance covariance, intercepts and regression coefficients, although it is possible to have partial invariance in the ε matrix of residuals (it is however, possible to have different blocks of ESEM factors such that invariance constraints are imposed in one block, but not the other). Furthermore, if the ESEM model contains both EFA factors and CFA factors, then all of the typical strategies for the SEM factors can be pursued with the CFA factors

As in EFA, in ESEM the unrotated factor loading matrix is rotated to achieve a more interpretable, simple structure. The wide range of rotation strategies available with EFA is also available with ESEM (Asparouhov & Muthén, 2009; Marsh et al., 2014). Nevertheless, we have a preference for target rotation that conceptually lies between the mechanical approach to EFA and the hypothesis-driven approach in CFA (see Browne, 2001). This is consistent with our application of ESEM and Set-ESEM as a hypothesis testing tool, and our juxtaposition of ESEM and Set-ESEM with CFA. Nevertheless, particularly in Study 1 based on data generated from a known population generating model, we demonstrate the application of Full-ESEM and Set-ESEM for both target the Geomin rotations. We also note that it is be easy for the applied researcher to make simple adjustments to this syntax (presented Appendices 1.C1-C6 in these Supplemental Materials) to explore the many additional rotations that are available with Mplus.

The target rotation criterion is designed to find a rotated solution ƒ that is closest to a prespecified matrix B. Not all entries in matrix B need to be specified. For identification purposes at least entries have to be specified in each column for oblique rotation and entries have to be specified in each column for orthogonal rotation. The rotation function is:

(3)

Where if is a target and 0 if is not a target, and is the targeted value. The most common specification choice for is 0, but it is possible to specify other fixed values as well. Specifying an increasing number of target loadings as fixed results in an increasingly constrained factor loading matrix. Indeed, specifying all can be a very useful and effective way to rotate the loading structure into a hypothesized simple structure. The known Target invariant loading structures can be described as follows. If all targets in the rotation function are correct then the ƒ matrix minimizes the rotation criteria. In addition, if at least zero targets are specified that satisfy the sufficient conditions 1 and 2 then the ƒ matrix is the unique minimum and therefore it is Target invariant.

Full- and Set-ESEM parameters can be identified with the maximum likelihood (ML), weighted least square, or with robust alternatives. Within a given model, is possible to posit a combination of CFA, Full-ESEM and Set-ESEM factors within the same model.

**Section 1.A2: Goodness-of-fit, Golden Rules, and Interpretation of Parameter Estimates**

In applied CFA/SEM studies, applied researchers have sought universal “golden rules” as to what constitutes an acceptable goodness of fit (Marsh, Balla, & McDonald, 1988; Marsh, Hau, & Wen, 2004). Generally, given the known sensitivity of the chi-square test to sample size, to minor deviations from multivariate normality, and to minor misspecifications, applied SEM research focuses on indices that are relatively sample-size independent (Hu & Bentler, 1999; Marsh, Hau, & Wen, 2004; Marsh, Hau, & Grayson 2005), such as the Root Mean Square Error of Approximation (RMSEA), the Tucker-Lewis Index (TLI), and the Comparative Fit Index (CFI). Population values of TLI and CFI vary along a 0-to-1 continuum, in which values greater than .90 and .95 typically reflect acceptable and excellent fits to the data, respectively. Values smaller than .08 and .06 for the RMSEA support acceptable and good model fits respectively.

The chi-square difference test can be used to compare two nested models, but this approach suffers from even more problems than does the chi-square test for single models—problems that led to the development of other fit indices (see Marsh, Hau et al., 2005). Cheung and Rensvold (2002) and Chen (2007) suggested that if the decrease in fit for the more parsimonious model is less than .01 for incremental fit indices such as the CFI, there is reasonable support for the more parsimonious model. For indices that incorporate a penalty for lack of parsimony, such as the RMSEA and the TLI, it is also possible for a more restrictive model to result in a better fit than would a less restrictive model. However, it is emphasized that these cut-off values constitute rough guidelines only, rather than “golden rules” (Marsh et al., 2004). Indeed, this emphasis of treating these cut-off values as rough guideline rather than golden rules applies even more strongly to Full- and Set-ESEM where there has not been a sufficient history of application to fully support the usefulness of cut-offs based on CFA models.

The basic CFA model is nested under the corresponding Set-ESEM, and the Set-ESEM is nested under the Full-ESEM. This nested structure facilitated conventional model comparisons which can be used to compare the fit of three models– along with a detailed evaluation of parameter estimates based on the three approaches. The Set- and Full-ESEMs are most appropriate when they fit the data better than the corresponding CFA model, the multiple ESEM factors are well-defined in the measurement model, and there are substantively important differences in parameter estimates based on the CFA and the ESEM models. Starting with the initial ESEM publications (Marsh, et al., 2009; Muthén & Asparouhov, 2009), Marsh et al. (2014) argued that factor correlations were typically positively biased unless the CFA assumption is met (all cross-loadings are exactly equal to zero in the population). Indeed, even when the ICM-CFA model apparently fits well, CFA factor correlations tend to be larger than ESEM factor correlations. Importantly, simulation studies show that ESEM is typically better at recovering known factor correlations and that even small cross-loadings can result in biased estimates of factor correlations when based on CFAs (Marsh et al., 2014). If ESEMs are sufficiently similar to CFA results, then there is robust support for the factor structure based on the CFA solution. Thus, it is always appropriate to test ESEMs even when CFA models are retained.

Marsh et al., (2014) also acknowledged that ESEM might lack parsimony (particularly in large, complex models based on moderate sample sizes). Set-ESEM was developed in part to achieve a better balance between the goodness-of-fit for the Full-ESEM and the parsimony of the CFA. However, because of the nesting relationship between the three models, parsimony based on the number of freely estimated parameters will always be best for CFA, followed by Set-ESEM, and then Full-ESEM, whereas the goodness of fit for indices that do not control for parsimony (e.g., the chi-square statistics and indices like the CFI that are monotonic with it) will always be better for ESEM, followed by Set-ESEM, and then CFA. However, for indices that control for parsimony (e.g., TLI and RMSEA), it is possible for the CFA model to fit better than the ESEM models, or for Set-ESEM to fit better than the Full-ESEM. Nevertheless, when these three models vary substantially in relation to parsimony, model evaluation should not rely solely – or even primarily – on the basis of goodness of fit.

**Section 1.A3: ESEM-within-CFA (EwC)**

Full- and Set-ESEM are highly flexible but, as initially operationalized, many CFA analyses could not be done with ESEM. Marsh, Lüdtke et al. (2013; Morin, Marsh, & Nagengast, 2013) proposed ESEM within CFA (EwC) to resolve most of these limitations of ESEM. Identification of the ESEM requires m2 constraints where M = number of factors. Marsh, Lüdtke, and colleagues proposed that this could be accomplished that by retaining parameters estimates in the final ESEM solution, and fixing m2 factor loadings in initial solution (2013). Thus, for example, fixing the all the factor loadings for the item with the highest factor loading for each factor for all the factors results in m2 constraints (i.e., there are m constraints associated with each of the m factors). The EwC solution is equivalent to the ESEM solution in terms of *df*, goodness of fit, and parameter estimates. However, the EwC is actually a CFA model based on the ESEM solution, thereby facilitating further models that are possible with CFA. Although previously applied in relation to Full-ESEM the some rationale can be applied to each set of ESEM factors within a Set-ESEM analysis, as illustrated in in the present investigation.

**Section 1.A4: A Priori Correlated Uniquenesses and Complex measurement error structures**

With Set- and Full-ESEM, like CFA, it is possible to model complex error structures, an important advantage that is not available with traditional approaches to EFA. Although typically it is dubious to introduce correlated uniquenesses ex post facto to improve fit, there are numerous situations in which models with a priori CUs should be the default model. Thus, for example, in longitudinal analyses in which the same items are administered across multiple waves, it is critical to incorporate a priori correlated uniquenesses (i.e., estimated correlations between item residuals) relating responses to the same items across multiple waves (Jöreskog, 1979; Marsh, Craven, et al., 2016; Marsh & Hau, 1996; Marsh, Lüdtke et al, 2013). Failure to do so is likely to result in a poor fitting model and in positively biased parameter estimates of stability over time which are likely to result in negatively biased estimates of the effects of other variables leading to that construct.

Similarly, when different factors in a multidimensional instrument are based on parallel worded items, the a priori model should also include CUs relating items with parallel wording. In models of complex multitrait-multi method (MTMM) data structures, a particularly useful model represents method effects as CUs between indicators representing the method (e.g., those from the same instrument if the multiple instruments are the multiple methods, those from the same informant if the multiple informants are the multiple methods, etc.). Of course, it is always reasonable to compare these a priori CUs with a more parsimonious model with no CUs. Applied researchers might also posit a priori error structures to account for method effects. Importantly, ESEM is similar to CFA/SEM, in terms of this added flexibility that is not available with traditional approaches to EFA (see subsequent discussion).

**Section 1.B: Design of the Simulated Data**

|  | Set 1 (Self-concept) | | | Set 2 (Interest) | | |
| --- | --- | --- | --- | --- | --- | --- |
| Variable | MSC | SSC | VSC | MIN | SIN | VIN |
| **Self-concept** | | |  |  |  |  |
| MSC1 | .70 | .25 | .25 | 0 | 0 | 0 |
| MSC2 | .70 | -.30 | .01 | 0 | 0 | 0 |
| MSC3 | .70 | -.20 | .01 | 0 | 0 | 0 |
| MSC4 | .70 | .01 | .01 | 0 | 0 | 0 |
| MSC5 | .70 | .01 | .15 | 0 | 0 | 0 |
| SSC1 | .25 | .70 | .25 | 0 | 0 | 0 |
| SSC2 | .01 | .70 | -.30 | 0 | 0 | 0 |
| SSC3 | .01 | .70 | -.20 | 0 | 0 | 0 |
| SSC4 | .01 | .70 | .01 | 0 | 0 | 0 |
| SSC5 | .15 | .70 | .01 | 0 | 0 | 0 |
| VSC1 | .25 | .25 | .70 | 0 | 0 | 0 |
| VSC2 | -.3 | .01 | .70 | 0 | 0 | 0 |
| VSC3 | .01 | .01 | .70 | 0 | 0 | 0 |
| VSC4 | .01 | .15 | .70 | 0 | 0 | 0 |
| VSC5 | -.2 | .01 | .70 | 0 | 0 | 0 |
| **Interest** |  |  |  |  |  |  |
| MIN1 | 0 | 0 | 0 | .70 | .25 | .25 |
| MIN2 | 0 | 0 | 0 | .70 | -.30 | .01 |
| MIN3 | 0 | 0 | 0 | .70 | -.20 | .01 |
| MIN4 | 0 | 0 | 0 | .70 | .01 | .01 |
| MIN5 | 0 | 0 | 0 | .70 | .01 | .15 |
| SIN1 | 0 | 0 | 0 | .25 | .70 | .25 |
| SIN2 | 0 | 0 | 0 | .01 | .70 | -.30 |
| SIN3 | 0 | 0 | 0 | .01 | .70 | -.20 |
| SIN4 | 0 | 0 | 0 | .01 | .70 | .01 |
| SIN5 | 0 | 0 | 0 | .15 | .70 | .01 |
| MIN1 | 0 | 0 | 0 | .25 | .25 | .70 |
| MIN2 | 0 | 0 | 0 | -.30 | .01 | .70 |
| MIN3 | 0 | 0 | 0 | .01 | .01 | .70 |
| MIN4 | 0 | 0 | 0 | .01 | .15 | .70 |
| MIN5 | 0 | 0 | 0 | -.20 | .01 | .70 |
| Correlation | MSC | SSC | VSC | MIN | SIN | VIN |
| MSC | 1.0 |  |  |  |  |  |
| SSC | .30 | 1.0 |  |  |  |  |
| VSC | .30 | .30 | 1.0 |  |  |  |
| MIN | .60 | .30 | .30 | 1.0 |  |  |
| SIN | .30 | .60 | .30 | .30 | 1.0 |  |
| VIN | .30 | .30 | .60 | .30 | .30 | 1.0 |

Note.Target factor loadings = 0.7; Minor cross-loadings = -.30 to +.25

(see Section 1.D for the population generating model)

**Section 1.C1: Syntax to Create Raw Data From the Population Generating Model**

TITLE: Monte Carlo simulation study for SET-ESEM

MONTECARLO: NAMES ARE

MSC1-MSC5 SSC1-SSC5 VSC1-VSC5

MIN1-MIN5 SIN1-SIN5 VIN1-VIN5 ;

NOBSERVATIONS = 10000;

NREPS = 1;

SEED = 4533;

REPSAVE = ALL;

SAVE = SETESEM-N10006fac-*.dat;

ANALYSIS: ESTIMATOR = MLR;

Model population:

!target loading set 1 = .7;

MSC by MSC1-MSC5@.7;

SSC by SSC1-SSC5@.7;

VSC by VSC1-VSC5@.7;

!cross-loading

MSC by SSC1@.25 SSC2@.01 SSC3@.01 SSC4@.01 SSC5@.15

VSC1@.25 VSC2@-.30 VSC3@.01 VSC4@.01 VSC5@-.20;

SSC by MSC1@.25 MSC2@-.30 MSC3@-.20 MSC4@.01 MSC5@.01

VSC1@.25 VSC2@.01 VSC3@.01 VSC4@.15 VSC5@.01;

VSC by MSC1@.25 MSC2@.01 MSC3@.01 MSC4@.01 MSC5@.15

SSC1@.25 SSC2@-.30 SSC3@-.20 SSC4@.01 SSC5@.01;

[MSC1-VSC5@0]; MSC1-VSC5@.3;

MSC-VSC@1; [MSC-VSC@0];

MSC-VSC WITH MSC-VSC@.30;

!target loading set 2

MIN by MIN1-MIN5@.7;

SIN by SIN1-SIN5@.7;

VIN by VIN1-VIN5@.7;

!cross-loading

MIN by SIN1@.25 SIN2@.01 SIN3@.01 SIN4@.01 SIN5@.15

VIN1@.25 VIN2@-.30 VIN3@.01 VIN4@.01 VIN5@-.20;

SIN by MIN1@.25 MIN2@-.30 MIN3@-.20 MIN4@.01 MIN5@.01

VIN1@.25 VIN2@.01 VIN3@.01 VIN4@.15 VIN5@.01;

VIN by MIN1@.25 MIN2@.01 MIN3@.01 MIN4@.01 MIN5@.15

SIN1@.25 SIN2@-.30 SIN3@-.20 SIN4@.01 SIN5@.01;

[MIN1-VIN5@0]; MIN1-VIN5@.3;

MIN-VIN@1; [MIN-VIN@0];

MIN-VIN WITH MIN-VIN@.30;

!correlations set1 with set 2

MSC with MIN@.6; SSC VSC with MIN@.3;

SSC with SIN@.6; MSC VSC with SIN@.3;

VSC with VIN@.6; MSC SSC with VIN@.3;

OUTPUT: tech9;

**Section 1.C2: Syntax for CFA Model (Study 1)**

TITLE: **CFA Model (Study 1**

TITLE: Data generation for SET-ESEM;

DATA:FILE='SETESEM-N10006fac-1.dat';

Variable: NAMES ARE

MSC1-MSC5 SSC1-SSC5 VSC1-VSC5

MIN1-MIN5 SIN1-SIN5 VIN1-VIN5 ;

ANALYSIS: ESTIMATOR = MLR;!PROCESSORS = 2;

MODEL:

MSC by MSC1-MSC5*;

SSC by SSC1-SSC5*;

VSC by VSC1-VSC5*;

MIN by MIN1-MIN5*;

SIN by SIN1-SIN5*;

VIN by VIN1-VIN5*;

MSC-VIN@1;

OUTPUT: sampstat sval TECH2 tech4 ;

**Section 1.C3: Syntax for Set-ESEM Target Rotation (Study 1)**

TITLE**: Set-ESEM Target Rotation**

TITLE: Data generation for SET-ESEM;

DATA:FILE='SETESEM-N10006fac-1.dat';

Variable: NAMES ARE

MSC1-MSC5 SSC1-SSC5 VSC1-VSC5

MIN1-MIN5 SIN1-SIN5 VIN1-VIN5 ;

ANALYSIS: ESTIMATOR = MLR;ROTATION=TARGET;

MODEL:

MSC by MSC1-MSC5 SSC1-SSC5~0 VSC1-VSC5~0(*1);

SSC by MSC1-MSC5~0 SSC1-SSC5 VSC1-VSC5~0(*1);

VSC by MSC1-MSC5~0 SSC1-SSC5~0 VSC1-VSC5(*1);

MIN by MIN1-MIN5 SIN1-SIN5~0 VIN1-VIN5~0(*2);

SIN by MIN1-MIN5~0 SIN1-SIN5 VIN1-VIN5~0(*2);

VIN by MIN1-MIN5~0 SIN1-SIN5~0 VIN1-VIN5 (*2);

OUTPUT: sampstat stdyx sval TECH2 tech4 ;

**Section 1C4: Syntax for Full-ESEM Target Rotation(Study 1)**

TITLE: **Full-ESEM Target Rotation(Study 1);**

DATA: FILE = SETESEM-N10006fac-1.dat ;

Variable: NAMES ARE

MSC1-MSC5 SSC1-SSC5 VSC1-VSC5

MIN1-MIN5 SIN1-SIN5 VIN1-VIN5;

USEVARIABLES = MSC1-VIN5;

ANALYSIS: ESTIMATOR = MLR;ROTATION=TARGET;

MODEL:

MSC by MSC1-MSC5 SSC1-SSC5~0 VSC1-VSC5~0

MIN1-MIN5~0 SIN1-SIN5~0 VIN1-VIN5~0 (*1);

SSC by MSC1-MSC5~0 SSC1-SSC5 VSC1-VSC5~0

MIN1-MIN5~0 SIN1-SIN5~0 VIN1-VIN5~0 (*1);

VSC by MSC1-MSC5~0 SSC1-SSC5~0 VSC1-VSC5

MIN1-MIN5~0 SIN1-SIN5~0 VIN1-VIN5~0 (*1);

MIN by MIN1-MIN5 SIN1-SIN5~0 VIN1-VIN5~0

MSC1-MSC5~0 SSC1-SSC5~0 VSC1-VSC5~0 (*1);

SIN by MIN1-MIN5~0 SIN1-SIN5 VIN1-VIN5~0

MSC1-MSC5~0 SSC1-SSC5~0 VSC1-VSC5~0 (*1);

VIN by MIN1-MIN5~0 SIN1-SIN5~0 VIN1-VIN5

MSC1-MSC5~0 SSC1-SSC5~0 VSC1-VSC5~0 (*1);

OUTPUT: SVAL tech4;

**Section 1C5: Syntax for Set-ESEM Geomin Rotation(Study 1)**

TITLE: **Set-ESEM Using Geomin**

DATA: FILE = SETESEM-N1000-71.dat ;

Variable: NAMES ARE

MSC1-MSC5 SSC1-SSC5 VSC1-VSC5

MIN1-MIN5 SIN1-SIN5 VIN1-VIN5;! ASP;

USEVARIABLES = MSC1-VIN5;

ANALYSIS: ESTIMATOR = MLR; ROTATION=GEOMIN(OBLIQUE);

MODEL:

MSC SSC VSC by MSC1-MSC5 SSC1-SSC5 VSC1-VSC5 (*1);

MIN SIN VIN by MIN1-MIN5 SIN1-SIN5 VIN1-VIN5 (*2) ;

OUTPUT: sampstat TECH2 tech4 ;

**Section 1C6: Syntax for Full-ESEM Geomin Rotation(Study 1)**

TITLE: **Full-ESEM Geomin Rotation;**

DATA: FILE = SETESEM-N1000-71.dat ;

Variable: NAMES ARE

MSC1-MSC5 SSC1-SSC5 VSC1-VSC5

MIN1-MIN5 SIN1-SIN5 VIN1-VIN5;! ASP;

USEVARIABLES = MSC1-VIN5;

ANALYSIS: ESTIMATOR = MLR; ROTATION=GEOMIN(OBLIQUE);

MODEL:

MSC SSC VSC MIN SIN VIN by MSC1-MSC5 SSC1-SSC5 VSC1-VSC5

MIN1-MIN5 SIN1-SIN5 VIN1-VIN5 (*1) ;

OUTPUT: tech4;

**Section 2: Dimensional Comparison Theory over Six Academic Subjects (Study 2)**

Dimensional Comparison Theory (DCT; Marsh, Lüdtke, et al., 2015; Marsh et al.,2017) posits that self-evaluations are based on dimensional comparisons (e.g., how my accomplishments in one school subject compare with my accomplishments in another school subject) as well as the more traditional social comparisons (how my accomplishments compare with my peers in the same school subject). For maximally different domains (e.g., math and verbal self-concepts that are at the opposite ends of the theoretical continuum of academic self-concept; See Section 3.A), DCT predicts that achievement in one subject has a positive effect on self-concept in the matching domain (e.g., mathematics achievement on mathematics self-concept) but a negative (contrasting) effect on self-concept in the non-matching domain (e.g., mathematics achievement on verbal self-concept). However, for subjects closer together on the underlying continuum, these negative effects of achievement in one subject on self-concept in another subject are posited to be much weaker or may even be positive (e.g., positive effects of math achievement on physics self-concept; positive effects of native language on foreign language self-concept).

Here we consider a reanalysis using Set-ESEM of the Marsh, Lüdtke, et al. (2015) study designed to test DCT. The study included six school subjects, three that are classified within the math/science domain (math, physics, biology) and three that are classified within the verbal domain (German, English, History). For each school subject there was a measure of achievement (school grades from student from school records) and a total of six self-belief items designed to measure academic self-concept (e.g., I am good in [subject]) or homework self-efficacy (e.g., If I make an effort, I can solve all the homework in [subject]). The set of six items for each subject had parallel wording. Because the focus of the study was on how self-beliefs in one subject were related to those in different subjects, it was important that responses to the different school subjects were not confounded. For this reason, here we apply Set-ESEM based on six sets, responses to the six self-report items for each of the six school subjects—one for each school subject (see related discussion of the similar model 1D in Figure 1). Indeed, Marsh, Lüdtke, et al. specifically noted that although two of the six items were unambiguously self-concept items and three were clearly self-efficacy items, one reflected both constructs and cross-loaded on both the self-efficacy factor and the self-concept factor for all six school subjects. Although the authors dealt with this problem using CFA with an ex-post facto modification, here we use Set-ESEM in order to demonstrate some interesting features of this approach.

A critical feature was the parallel wording used to measure each self-concept and self-efficacy factors; the likely item-specific method effects, as well as the possible invariance across the self-concept and self-efficacy factors. In particular, it is well-known (see Marsh & Hau, 1996; Marsh, Lüdtke, et al., 2013) that the use of parallel-worded items results in item-specific method effects. Thus, responses to a pair of items with parallel wording used to measure different factors are likely to be more positively correlated with each other than can be explained in terms of the correlation between the latent factors that each is designed to measure. This issue is similar to that encountered in Study 2 for longitudinal data in which the same items were administered on multiple occasions. If this feature of the data is not controlled and appropriately incorporated into the model, goodness of fit is likely to be poor and interpretations of parameter estimates will be biased. There are two typical approaches to address this problem. The first is to include a set of correlated uniquenesses between each item (see Model 1E in Figure 1). The second is to incorporate the items with parallel wording into a single item method factor (see Figure 3A). This second approach is similar in logic to the method factors posited in some approaches to MTMM data, but is also similar to the bifactor model. In many respects the use of parallel worded items is a nuisance that must be dealt with in the analysis. However, the use of parallel-worded items also means that it is possible to test whether factor loadings for the same item are invariant across different domains. Methodologically support for invariance results in a substantially more parsimonious model that might be particularly important for potentially unstable Full-ESEM models that typically lack parsimony. However, support for invariance is also substantively important in relation to comparing results based on different domains (i.e., school subjects in this application).

**Validity of Self-Belief Factors in Relation to Achievement**

In Models M4 and M5 (Table 2.1 and Figures 3A & 3B) we tested the validity of the self-belief factors in relation to 6 achievement measures (school grades for each of the six subjects corresponding to the six domains for the self-concept and self-efficacy measures). For present purposes, our primary focus is on the correlations among the six self-concept factors, the six self-efficacy factors, and the six achievement scores for the Set-ESEM model M4. In support of the domain specificity and convergent validity of the self-concept factors, each self-concept factor was substantially correlated with the matching self-efficacy factor (*r*s vary from .52 to .64; Supplemental Table 2.2) and for matching domains of achievement (*r*s vary from .50 to .69). In support of their discriminant validity, these correlations were consistently much larger than correlations among the self-concept factors (*r*s vary from -.23 to .45) and correlations between self-concept and non-matching achievements (*r*s vary from -.14 to .28). There was also support for the convergent validity of homework self-efficacy in relation to achievement (*r*s vary from .30 to .42). Although weaker than correlations between matching domains of self-concept and achievement, these convergent validities were still substantially higher than correlations of self-efficacy factors to non-matching areas of achievement (*r*s vary from -.16 to .22). In summary, results provide good support for the convergent and discriminant validity of self-concept and self-efficacy factors in relation to each other and to achievement.

The pattern of results based on the Set-ESEM solution is also reflected in the CFA solution. Indeed, the only major difference is for the correlations among the self-concept and self-efficacy items. The correlations are substantially higher for the CFA solution – particularly for the matching domains (*r*s vary from .65 to .81) but also for the non-matching domains (*r*s vary from -.15 to .36). Hence, the differentiation between self-concept and self-efficacy is much stronger for the Set-ESEM solution than for the CFA solution. This follows from earlier discussion where Marsh, Lüdtke, et al. (2015) noted that one of the items designed to measure self-efficacy was actually reflected, at least in part, by self-concept. Forcing this item to load only on the CFA factors meant that the relation between CFA self-concept and self-efficacy factors are systematically inflated relative to the corresponding Set-ESEM factors where this item loaded substantially on both the self-concept and self-efficacy factors for each domain.

Model M5 (Supplemental Table 2.2; Figure 3B in main text) was especially designed to test DCT predictions when the 12 self-belief factors are regressed on the six achievement scores. Specifically, achievements at either end of the achievement continuum are posited to have substantial positive effects on matching self-belief factors, but negative effects on self-belief factors at the opposite end (e.g., math and physics achievement on German and English self-beliefs; German and English achievement on math and physics self-beliefs). It is important to emphasize that M4 and M5 are equivalent models in the sense that both have the same *df* and goodness of fit; the correlations relating achievement and the self-belief factors in M4 are replaced with path coefficients in M5. The Set-ESEM model provides good support for DCT predictions, particularly in relation to self-concept. For example (see Supplemental Table 2.3), English self-concept is positively predicted by English achievement (.631) but also German achievement (.108), but significantly negatively predicted by achievements in math (-.137) and physics (-.129). In contrast physics self-concept is significantly positively predicted by achievements in physics (.492) but also math (.147), but significantly negatively predicted by achievements in German (-.104) and English (-.133). Although support for predictions based on self-efficacy responses is weaker, the pattern of results is similar. Again, we note that the CFA results largely parallel those based on Set-ESEM. Whereas our focus is on the application of Set-ESEM, the substantive implications are discussed in more detail by Marsh, Lüdtke, et al. (2015).

In summary, the factor structure underlying the self-concept and homework self-efficacy responses is well-defined and consistent with a priori expectations. Compared to typical EFAs, the Set-ESEM approach used here is critical in terms of taking into account the complex measurement structure and cross-loadings of the item reflecting both self-concept and self-efficacy. The superiority of Set-ESEM over the traditional Full-ESEM was also clear in that the Full-ESEM M1 did not result in a well-defined factor structure and M2 did not even converge. Furthermore, even if the Full-ESEM M2 had converged and resulted in a well-defined factor structure, there is no straight-forward way to test invariance as in model M3 tested in both the CFA and Set-ESEM analyses. However, it is also important to note that the pattern of results was surprisingly similar for the CFA and Set-ESEM solutions, with the exception of the inflated CFA correlations between matching self-concept and self-efficacy factors. Nevertheless, the empirical similarity of the two sets of results should not be seen as a weakness of Set-ESEM, but merely supports the robustness of the substantive interpretations of the results. Our preference is for the Set-ESEM models (particularly M3, M4 and M5 that were nearly as parsimonious as the corresponding CFA models), because of issues with the substantial cross-loading of one of the self-efficacy items on the self-concept factor. However, even if researchers were to argue for the CFA instead of Set-ESEM approach, the juxtaposition of the two approaches—showing that the more parsimonious CFA fits nearly as well as the Set-ESEM -- is stronger than results based on either one or the other of the two approaches. Furthermore, the results provide a clear example of the superiority of the Set-ESEM approach over the typical Full-ESEM approach.

**Section 2A: Theoretical Model of the Continuum of Academic Self-Concept Constructs
(along a continuum that varies from verbal to math. Contrast is posited be greater for school subjects that are more distant along the academic continuum)**


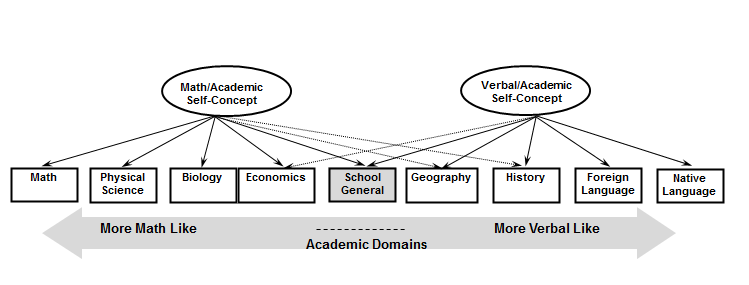


**Supplemental Table 2A1**

*Correlations Among Self-Concepts, Self-Efficacies, Achievements (CFA Above Main Diagonal, Set-ESEM Below)*

|  | DSC | ESC | GSC | BSC | PSC | MSC | DSEf | ESEf | GSEf | BSEf | PSEf | MSEf | DAch | Ach | GAch | BAch | PAch | MAch |
| --- | --- | --- | --- | --- | --- | --- | --- | --- | --- | --- | --- | --- | --- | --- | --- | --- | --- | --- |
| **Self-concept (SC)** | | | | | | | | | | | | | | | | | | |
| DSC | 1.00 | .31 | .19 | .29 | -.12 | -.10 | .65 | .24 | .17 | .09 | -.15 | -.15 | .58 | .14 | .16 | .16 | -.02 | -.07 |
| ESC | .32 | 1.00 | .04 | .16 | -.25 | -.17 | .26 | .81 | .13 | .24 | -.14 | -.13 | .32 | .65 | .08 | .19 | -.07 | -.06 |
| GSC | .21 | .06 | 1.00 | .21 | .26 | .05 | .31 | .20 | .79 | .30 | .14 | .06 | .06 | .05 | .61 | .07 | .22 | .02 |
| BSC | .27 | .18 | .19 | 1.00 | .22 | .11 | .26 | .28 | .24 | .77 | .14 | .15 | .18 | .12 | .19 | .53 | .20 | .02 |
| PSC | -.12 | -.23 | .26 | .17 | 1.00 | .45 | -.01 | -.11 | .18 | .15 | .76 | .31 | -.15 | -.07 | .20 | .12 | .55 | .27 |
| MSC | -.09 | -.18 | .07 | .07 | .45 | 1.00 | .01 | -.05 | .08 | .12 | .36 | .77 | -.08 | -.03 | .10 | .16 | .28 | .59 |
| **Self-Efficacy (SEf)** | | | | | | | | | | | | | | | | | | |
| DSEf | .50 | .21 | .19 | .21 | -.09 | -.03 | 1.00 | .59 | .57 | .50 | .10 | .20 | .35 | .16 | .18 | .21 | .06 | .05 |
| ESEf | .18 | .71 | .14 | .26 | -.16 | -.06 | .63 | 1.00 | .40 | .48 | .08 | .14 | .22 | .46 | .06 | .16 | -.06 | -.03 |
| GSEf | .14 | .10 | .67 | .23 | .09 | .08 | .61 | .46 | 1.00 | .52 | .30 | .26 | .01 | .06 | .34 | .11 | .18 | .01 |
| BSEf | .06 | .19 | .22 | .69 | .06 | .09 | .53 | .52 | .54 | 1.00 | .28 | .29 | .09 | .10 | .19 | .35 | .15 | .05 |
| PSEf | -.14 | -.16 | .11 | .16 | .62 | .34 | .21 | .17 | .36 | .34 | 1.00 | .52 | -.17 | -.07 | .02 | .07 | .38 | .17 |
| MSEf | -.17 | -.15 | -.03 | .13 | .23 | .69 | .28 | .23 | .33 | .37 | .54 | 1.00 | -.16 | -.11 | -.02 | .06 | .14 | .39 |
| **Achievement (Ach)** | | | | | | | | | | | | | | | | | | |
| DAch | .57 | .31 | .05 | .20 | -.14 | -.08 | .33 | .22 | .03 | .07 | -.16 | -.14 | 1.00 | .31 | .15 | .23 | -.03 | .10 |
| EAch | .16 | .64 | .05 | .12 | -.06 | -.04 | .10 | .42 | .04 | .08 | -.08 | -.10 | .31 | 1.00 | .20 | .24 | .14 | .16 |
| GAch | .17 | .08 | .62 | .20 | .21 | .13 | .15 | .04 | .30 | .15 | .00 | -.06 | .16 | .20 | 1.00 | .30 | .34 | .26 |
| BAch | .15 | .18 | .04 | .52 | .12 | .15 | .21 | .18 | .13 | .34 | .08 | .08 | .23 | .25 | .29 | 1.00 | .25 | .16 |
| PAch | -.02 | -.07 | .21 | .21 | .54 | .28 | .05 | -.05 | .17 | .13 | .34 | .14 | -.04 | .14 | .34 | .25 | 1.00 | .31 |
| MAch | -.07 | -.06 | .01 | .01 | .28 | .59 | .03 | -.04 | .00 | .04 | .14 | .36 | .10 | .16 | .26 | .16 | .32 | 1.00 |

Note. For each construct (SC = self-concept; SEf = homework self-efficacy; Ach = achievement) there are six domains representing six school subjects (D = German; E = English; G = Geography; B = biology; P = Physics; M = Math). Coefficients in white (outlined in black) are between matching self-concept and self-efficacies. Correlations shaded in gray are between achievement and matching domains of self-concept and self-efficacy.

**Supplemental Table 2.A2**

*Path Coefficients Leading from Achievements (Ach) to Self-Belief Constructs (ASC = self-concept; Self-efficacy =SEff) for CFA and Set-ESEM solutions*

Self ACH Set-ESEM

D SC SEff SC SEff

DACH .587(.045) .314(.055) .568(.049) .302(.051)

EACH -.051(.060) .015(.059) -.016(.059) -.032(.054)

GACH .111(.065) .103(.078) .122(.066) .070(.073)

BACH .029(.065) .101(.071) .004(.070) .127(.057)

PACH .012(.062) .021(.079) .013(.064) .024(.072)

MACH -.161(.061) -.036(.055) -.158(.062) -.040(.048)

E

DACH .120(.053) .071(.057) .108(.053) .084(.057)

EACH .638(.049) .452(.058) .631(.050) .402(.058)

GACH -.008(.047) -.009(.056) .003(.045) -.029(.064)

BACH .063(.047) .080(.071) .048(.046) .104(.064)

PACH -.125(.043) -.106(.061) -.129(.043) -.095(.059)

MACH -.138(.042) -.088(.045) -.137(.040) -.087(.050)

G

DACH .020(.061) -.032(.072) .006(.059) -.013(.070)

EACH -.044(.065) .003(.071) -.035(.069) -.018(.061)

GACH .665(.055) .342(.085) .684(.054) .283(.090)

BACH -.115(.063) .010(.073) -.147(.064) .051(.068)

PACH .077(.063) .087(.070) .070(.063) .090(.068)

MACH -.159(.058) -.104(.056) -.157(.058) -.104(.052)

B

DACH .087(.047) .005(.056) .108(.051) -.002(.053)

EACH -.033(.063) .001(.056) -.040(.064) -.014(.052)

GACH .025(.065) .089(.062) .044(.072) .049(.068)

BACH .497(.075) .312(.065) .477(.070) .324(.062)

PACH .105(.075) .051(.074) .116(.082) .044(.072)

MACH -.104(.052) -.040(.057) -.116(.059) -.036(.055)

P

DACH -.111(.043) -.133(.055) -.104(.044) -.116(.055)

EACH -.133(.047) -.090(.050) -.133(.048) -.101(.051)

GACH .025(.060) -.115(.068) .042(.061) -.122(.069)

BACH .019(.051) .045(.065) .013(.053) .062(.058)

PACH .505(.059) .379(.065) .492(.057) .355(.064)

MACH .134(.050) .103(.067) .147(.051) .074(.062)

M

DACH -.121(.047) -.163(.051) -.118(.047) -.145(.052)

EACH -.108(.047) -.126(.043) -.122(.047) -.117(.040)

GACH -.083(.064) -.126(.056) -.042(.066) -.164(.056)

BACH .117(.056) .091(.061) .100(.057) .110(.053)

PACH .103(.072) .039(.072) .103(.069) .049(.073)

MACH .591(.041) .429(.056) .584(.040) .401(.052)

Note. For each construct (SC = self-concept; Seff = homework self-efficacy; Ach = achievement) there are six domains representing six school subjects (D = German; E = English; G = Geography; B = biology; P = Physics; M = Math). Values in parentheses are standard errors. Path coefficients that differ from zero by more than 1.96 SEs are statistically significant (*p* < .05).

**Section 2.B: Mplus syntax For Set-ESEM**

TITLE: DCT model based on homework data;

DATA: FILE IS six subject study Sept2016mplus.dat;

MISSING ARE all (-99);

USEVARIABLES ARE

rskb1_e, skb2_e,rexp1_e,exp2_e,exp3_e,exp4_e,

rskb1_m, skb2_m,rexp1_m,exp2_m,exp3_m,exp4_m,

rskb1_d, skb2_d,rexp1_d,exp2_d,exp3_d,exp4_d,

rskb1_g, skb2_g,rexp1_g,exp2_g,exp3_g,exp4_g,

rskb1_b, skb2_b,rexp1_b,exp2_b,exp3_b,exp4_b,

rskb1_p, skb2_p,rexp1_p,exp2_p,exp3_p,exp4_p,

;

cluster is idCLASS;

! Complex design option is used to adjust for students nested within classes

ANALYSIS: ROTATION=target (oblique); ESTIMATOR=MLR; type=complex;

MODEL:

!Self-concept factors in six school subjects;

eSC by rskb1_e skb2_e rEXP1_e-exp4_e~0(*te1 1);

dSC by rskb1_d skb2_d rEXP1_d-exp4_d~0(*td1 1);

gSC by rskb1_g skb2_g rEXP1_g-exp4_g~0(*tg1 1);

bSC by rskb1_b skb2_b rEXP1_b-exp4_b~0(*tb1 1);

pSC by rskb1_p skb2_p rEXP1_p-exp4_p~0(*tp1 1);

mSC by rskb1_m skb2_m rEXP1_m-exp4_m~0(*tm1 1);

!the 6 items defining each SC factor has the same factor loadings across the 6 subjects

! because the all end in "1). For example, the factor loading of rskb1_e on eSC is the

!same as the rskb1_d loading on the dSC factor.

!This is reasonable because of the parallel item wording

!Homework Self-efficacy factors in six school subjects;

eHWK by rskb1_e-skb2_e~0,rEXP1_e-exp4_e(*te1 2);

dHWK by rskb1_d-skb2_d~0,rEXP1_d-exp4_d(*td1 2);

gHWK by rskb1_g-skb2_g~0,rEXP1_g-exp4_g(*tg1 2);

bHWK by rskb1_b-skb2_b~0,rEXP1_b-exp4_b(*tb1 2);

pHWK by rskb1_p-skb2_p~0,rEXP1_p-exp4_p(*tp1 2);

mHWK by rskb1_m-skb2_m~0,rEXP1_m-exp4_m(*tm1 2);

!the 6 items defining each HWK factor have the same factor loadings across the 6 subjects

! because the all end in "1—i.e. )

!For each subject, the SC and HWK are defined to be a single set

!(e.g, the "(*te1 " at the end of the esc and eHWK factors)

ITEM1 by rskb1_e* rskb1_m rskb1_d rskb1_g rskb1_b rskb1_p ;

ITEM2 by skb2_e* skb2_m skb2_d skb2_g skb2_b skb2_p ;

item3 by rEXP1_e* rEXP1_m rEXP1_d rEXP1_g rEXP1_b rEXP1_p;

item4 by exp2_e* exp2_m exp2_d exp2_g exp2_b exp2_p;

item5 by exp3_e* exp3_m exp3_d exp3_g exp3_b exp3_p;

item6 by exp4_e* exp4_m exp4_d exp4_g exp4_b exp4_p;

ITEM1@1;ITEM2@1;ITEM3@1;ITEM4@1;ITEM5@1;ITEM6@1;

! A separate item-method factor is defined for each of the 6 items;

dSC eSC-msc dHWK-MhWK WITH ITEM1-ITEM6@0;

ITEM1-Item6 WITH ITEM1-Item6@0;

!Item method-factors are defined to be uncorrelated with each other and all other factors;

OUTPUT: TECH1 TECH4 TECH8 STDYX sampstat svalues MODINDICES(ALL) ;

**Section 3.A*:*Target Factor Loadings for 15 Well-Being Factors (Study 3)**

| **Target Factor Loadings For:** | | | | | |
| --- | --- | --- | --- | --- | --- |
|  | Full-ESEM | SET-ESEM | CFA |  |  |
| SSC BY |  |  |  |  |  |
| SDQ_SS1 | 0.88 | 0.95 | 0.91 |  |  |
| SDQ_SS2 | 0.72 | 0.81 | 0.88 |  |  |
| SDQ_SS3 | 0.81 | 0.93 | 0.92 |  |  |
| SSA BY |  |  |  |  |  |
| SDQ_SS4 | 0.53 | 0.70 | 0.86 |  |  |
| SDQ_SS5 | 0.78 | 0.91 | 0.82 |  |  |
| SDQ_SS6 | 0.71 | 0.88 | 0.84 |  |  |
| HOPE BY |  |  |  |  |  |
| HOP_1 | 0.60 | 0.79 | 0.70 |  |  |
| HOP_2 | 0.63 | 0.76 | 0.75 |  |  |
| WB_1 | 0.56 | 0.61 | 0.85 |  |  |
| HOP_3 | 0.67 | 0.87 | 0.79 |  |  |
| POSEM BY |  |  |  |  |  |
| P_PA_1 | 0.70 | 0.82 | 0.91 |  |  |
| P_PA_2 | 0.82 | 1.01 | 0.92 |  |  |
| P_PA_3 | 0.63 | 0.74 | 0.83 |  |  |
| SEW BY |  |  |  |  |  |
| SDQ_SE1 | 0.26 | 0.48 | 0.90 |  |  |
| SDQ_SE2 | 0.73 | 0.86 | 0.90 |  |  |
| SDQ_SE3 | 0.75 | 0.91 | 0.86 |  |  |
| SDQ_SE4 | 0.92 | 0.99 | 0.79 |  |  |
| SEP BY |  |  |  |  |  |
| SDQ_SE5 | 0.52 | 0.55 | 0.83 |  |  |
| SDQ_SE6 | 0.58 | 0.67 | 0.72 |  |  |
| SDQ_SE7 | 0.63 | 0.78 | 0.74 |  |  |
| SDQ_SE8 | 0.66 | 0.83 | 0.85 |  |  |
| ABUOY BY |  |  |  |  |  |
| ABUOY_1 | 0.80 | 0.82 | 0.70 |  |  |
| ABUOY_2 | 0.74 | 0.75 | 0.80 |  |  |
| ABUOY_3 | 0.57 | 0.63 | 0.78 |  |  |
| ABUOY_4 | 0.83 | 0.85 | 0.78 |  |  |
| HEAL BY |  |  |  |  |  |
| HEAL_2 | 0.68 | 0.78 | 0.87 |  |  |
| HEAL_3 | 0.79 | 0.90 | 0.89 |  |  |
| HEAL_4 | 0.60 | 0.74 | 0.73 |  |  |
| VIT BY |  |  |  |  |  |
| VIT_1 | 0.51 | 0.66 | 0.84 |  |  |
| VIT_2 | 0.78 | 0.89 | 0.88 |  |  |
| VIT_3 | 0.42 | 0.62 | 0.68 |  |  |
| VIT_4 | 0.97 | 1.04 | 0.89 |  |  |
| FRS BY |  |  |  |  |  |
| SDT_F1 | 0.80 | 0.84 | 0.88 |  |  |
| SDT_F2 | 0.78 | 0.89 | 0.91 |  |  |
| SDT_F3 | 0.77 | 0.81 | 0.76 |  |  |
| CRS BY |  |  |  |  |  |
| SDT_C1 | 0.91 | 0.93 | 0.90 |  |  |
| SDT_C2 | 0.78 | 0.82 | 0.87 |  |  |
| SDT_C3 | 0.88 | 0.89 | 0.87 |  |  |
| TRS BY |  |  |  |  |  |
| SDT_T1 | 0.83 | 0.86 | 0.88 |  |  |
| SDT_T2 | 0.84 | 0.89 | 0.90 |  |  |
| SDT_T3 | 0.83 | 0.87 | 0.87 |  |  |
| PEERRS BY |  |  |  |  |  |
| PEER_1 | 0.84 | 0.83 | 0.81 |  |  |
| PEER_3 | 0.77 | 0.80 | 0.78 |  |  |
| PEER_4 | 0.76 | 0.79 | 0.83 |  |  |
| CIAI BY |  |  |  |  |  |
| CI_AI1 | 0.76 | 0.81 | 0.87 |  |  |
| CI_AI2 | 0.78 | 0.86 | 0.85 |  |  |
| CI_AI3 | 0.45 | 0.55 | 0.69 |  |  |
| CICI BY |  |  |  |  |  |
| CI_CI1 | 0.32 | 0.30 | 0.61 |  |  |

|  | Target Factor **Loadings For:** | | |
| --- | --- | --- | --- |
|  | Full-ESEM | SET-ESEM | CFA |
| SSC BY |  |  |  |
| SDQ_SS1 | 0.88 | 0.95 | 0.91 |
| SDQ_SS2 | 0.72 | 0.81 | 0.88 |
| SDQ_SS3 | 0.81 | 0.93 | 0.92 |
| SSA BY |  |  |  |
| SDQ_SS4 | 0.53 | 0.7 | 0.86 |
| SDQ_SS5 | 0.78 | 0.91 | 0.82 |
| SDQ_SS6 | 0.71 | 0.88 | 0.84 |
| HOPE BY |  |  |  |
| HOP_1 | 0.6 | 0.79 | 0.7 |
| HOP_2 | 0.63 | 0.76 | 0.75 |
| WB_1 | 0.56 | 0.61 | 0.85 |
| HOP_3 | 0.67 | 0.87 | 0.79 |
| POSEM BY | |  |  |
| P_PA_1 | 0.7 | 0.82 | 0.91 |
| P_PA_2 | 0.82 | 1.01 | 0.92 |
| P_PA_3 | 0.63 | 0.74 | 0.83 |
| SEW BY |  |  |  |
| SDQ_SE1 | 0.26 | 0.48 | 0.9 |
| SDQ_SE2 | 0.73 | 0.86 | 0.9 |
| SDQ_SE3 | 0.75 | 0.91 | 0.86 |
| SDQ_SE4 | 0.92 | 0.99 | 0.79 |
| SEP BY |  |  |  |
| SDQ_SE5 | 0.52 | 0.55 | 0.83 |
| SDQ_SE6 | 0.58 | 0.67 | 0.72 |
| SDQ_SE7 | 0.63 | 0.78 | 0.74 |
| SDQ_SE8 | 0.66 | 0.83 | 0.85 |
| ABUOY BY | |  |  |
| ABUOY_1 | 0.8 | 0.82 | 0.7 |
| ABUOY_2 | 0.74 | 0.75 | 0.8 |
| ABUOY_3 | 0.57 | 0.63 | 0.78 |
| ABUOY_4 | 0.83 | 0.85 | 0.78 |
| HEAL BY |  |  |  |
| HEAL_2 | 0.68 | 0.78 | 0.87 |
| HEAL_3 | 0.79 | 0.9 | 0.89 |
| HEAL_4 | 0.6 | 0.74 | 0.73 |
| VIT BY |  |  |  |
| VIT_1 | 0.51 | 0.66 | 0.84 |
| VIT_2 | 0.78 | 0.89 | 0.88 |
| VIT_3 | 0.42 | 0.62 | 0.68 |
| VIT_4 | 0.97 | 1.04 | 0.89 |
| FRS BY |  |  |  |
| SDT_F1 | 0.8 | 0.84 | 0.88 |
| SDT_F2 | 0.78 | 0.89 | 0.91 |
| SDT_F3 | 0.77 | 0.81 | 0.76 |
| CRS BY |  |  |  |
| SDT_C1 | 0.91 | 0.93 | 0.9 |
| SDT_C2 | 0.78 | 0.82 | 0.87 |
| SDT_C3 | 0.88 | 0.89 | 0.87 |
| TRS BY |  |  |  |
| SDT_T1 | 0.83 | 0.86 | 0.88 |
| SDT_T2 | 0.84 | 0.89 | 0.9 |
| SDT_T3 | 0.83 | 0.87 | 0.87 |
| PEERRS BY | |  |  |
| PEER_1 | 0.84 | 0.83 | 0.81 |
| PEER_3 | 0.77 | 0.8 | 0.78 |
| PEER_4 | 0.76 | 0.79 | 0.83 |
| CIAI BY |  |  |  |
| CI_AI1 | 0.76 | 0.81 | 0.87 |
| CI_AI2 | 0.78 | 0.86 | 0.85 |
| CI_AI3 | 0.45 | 0.55 | 0.69 |
| CICI BY |  |  |  |
| CI_CI1 | 0.32 | 0.3 | 0.61 |

Note. Target loadings for the items designed to measure each of the 15 Well-being factors based on the non-Set Full-ESEM , Set-ESEM, and CFA. For CFA non-target loadings are all constrained to be zero. In the full-ESEM there are 670 non-target loadings (i.e., 15 factors x 50 items less 50 target loadings), whereas in the SET-ESEM there are 76 non-target loadings (the remaining 594 non-target loadings are constrained to be zero (see Figure 4 in main text)

**Section 3.B: Factor Correlations Among 15 Well-Being Factors (Study3)**

| CFA |  |  |  |  |  |  |  |  |  |  |  |  |  |  |  |
| --- | --- | --- | --- | --- | --- | --- | --- | --- | --- | --- | --- | --- | --- | --- | --- |
| SSC | 1.00 |  |  |  |  |  |  |  |  |  |  |  |  |  |  |
| SSA | 0.81 | 1.00 |  |  |  |  |  |  |  |  |  |  |  |  |  |
| HOPE | 0.65 | 0.62 | 1.00 |  |  |  |  |  |  |  |  |  |  |  |  |
| POSEM | 0.62 | 0.57 | 0.81 | 1.00 |  |  |  |  |  |  |  |  |  |  |  |
| SEW | 0.56 | 0.56 | 0.81 | 0.81 | 1.00 |  |  |  |  |  |  |  |  |  |  |
| SEP | 0.69 | 0.78 | 0.75 | 0.72 | 0.61 | 1.00 |  |  |  |  |  |  |  |  |  |
| ABUOY | 0.51 | 0.54 | 0.62 | 0.63 | 0.65 | 0.81 | 1.00 |  |  |  |  |  |  |  |  |
| HEAL | 0.56 | 0.56 | 0.69 | 0.62 | 0.53 | 0.62 | 0.65 | 1.00 |  |  |  |  |  |  |  |
| VIT | 0.57 | 0.58 | 0.78 | 0.74 | 0.61 | 0.72 | 0.65 | 0.81 | 1.00 |  |  |  |  |  |  |
| FRS | 0.44 | 0.42 | 0.65 | 0.65 | 0.46 | 0.66 | 0.59 | 0.55 | 0.62 | 1.00 |  |  |  |  |  |
| CRS | 0.48 | 0.39 | 0.59 | 0.60 | 0.49 | 0.58 | 0.54 | 0.53 | 0.57 | 0.64 | 1.00 |  |  |  |  |
| TRS | 0.61 | 0.49 | 0.63 | 0.63 | 0.49 | 0.57 | 0.57 | 0.55 | 0.57 | 0.55 | 0.61 | 1.00 |  |  |  |
| PEERRS | 0.43 | 0.32 | 0.45 | 0.46 | 0.41 | 0.40 | 0.44 | 0.40 | 0.39 | 0.34 | 0.45 | 0.49 | 1.00 |  |  |
| CIAI | 0.38 | 0.32 | 0.47 | 0.41 | 0.41 | 0.45 | 0.40 | 0.41 | 0.42 | 0.45 | 0.50 | 0.39 | 0.34 | 1.00 |  |
| CICI | 0.39 | 0.36 | 0.44 | 0.38 | 0.41 | 0.40 | 0.42 | 0.40 | 0.37 | 0.40 | 0.49 | 0.38 | 0.36 | 0.80 | 1.00 |
|  | 8.70 | 7.50 | 8.69 | 7.65 | 6.06 | 6.20 | 5.26 | 4.65 | 3.94 | 3.37 | 3.04 | 2.26 | 1.70 | 1.80 | 1.00 |
| Full ESEM |  |  |  |  |  |  |  |  |  |  |  |  |  |  |  |
| SSC | 1.00 |  |  |  |  |  |  |  |  |  |  |  |  |  |  |
| SSA | 0.68 | 1.00 |  |  |  |  |  |  |  |  |  |  |  |  |  |
| HOPE | 0.52 | 0.41 | 1.00 |  |  |  |  |  |  |  |  |  |  |  |  |
| POSEM | 0.50 | 0.35 | 0.65 | 1.00 |  |  |  |  |  |  |  |  |  |  |  |
| SEW | 0.42 | 0.35 | 0.65 | 0.69 | 1.00 |  |  |  |  |  |  |  |  |  |  |
| SEP | 0.55 | 0.60 | 0.58 | 0.54 | 0.68 | 1.00 |  |  |  |  |  |  |  |  |  |
| ABUOY | 0.41 | 0.37 | 0.47 | 0.54 | 0.57 | 0.47 | 1.00 |  |  |  |  |  |  |  |  |
| HEAL | 0.42 | 0.37 | 0.51 | 0.43 | 0.44 | 0.43 | 0.37 | 1.00 |  |  |  |  |  |  |  |
| VIT | 0.46 | 0.40 | 0.65 | 0.60 | 0.61 | 0.48 | 0.52 | 0.69 | 1.00 |  |  |  |  |  |  |
| FRS | 0.32 | 0.24 | 0.50 | 0.52 | 0.55 | 0.45 | 0.36 | 0.39 | 0.50 | 1.00 |  |  |  |  |  |
| CRS | 0.41 | 0.25 | 0.49 | 0.52 | 0.50 | 0.42 | 0.43 | 0.41 | 0.51 | 0.56 | 1.00 |  |  |  |  |
| TRS | 0.53 | 0.33 | 0.53 | 0.52 | 0.47 | 0.44 | 0.42 | 0.42 | 0.49 | 0.46 | 0.56 | 1.00 |  |  |  |
| PEERRS | 0.36 | 0.17 | 0.33 | 0.37 | 0.32 | 0.34 | 0.37 | 0.29 | 0.31 | 0.25 | 0.41 | 0.43 | 1.00 |  |  |
| CIAI | 0.21 | 0.10 | 0.27 | 0.20 | 0.24 | 0.19 | 0.25 | 0.17 | 0.23 | 0.27 | 0.35 | 0.23 | 0.23 | 1.00 |  |
| CICI | 0.28 | 0.24 | 0.32 | 0.28 | 0.30 | 0.29 | 0.34 | 0.28 | 0.28 | 0.29 | 0.45 | 0.32 | 0.32 | 0.65 | 1.00 |
|  | 7.06 | 5.18 | 6.95 | 6.21 | 5.67 | 4.51 | 4.05 | 3.65 | 3.33 | 2.82 | 2.77 | 1.98 | 1.55 | 1.65 | 1.00 |
| Set-ESEM |  |  |  |  |  |  |  |  |  |  |  |  |  |  |  |
| SSC | 1.00 |  |  |  |  |  |  |  |  |  |  |  |  |  |  |
| SSA | 0.80 | 1.00 |  |  |  |  |  |  |  |  |  |  |  |  |  |
| HOPE | 0.65 | 0.62 | 1.00 |  |  |  |  |  |  |  |  |  |  |  |  |
| POSEM | 0.61 | 0.55 | 0.77 | 1.00 |  |  |  |  |  |  |  |  |  |  |  |
| SEW | 0.55 | 0.55 | 0.78 | 0.80 | 1.00 |  |  |  |  |  |  |  |  |  |  |
| SEP | 0.69 | 0.78 | 0.74 | 0.69 | 0.76 | 1.00 |  |  |  |  |  |  |  |  |  |
| ABUOY | 0.49 | 0.51 | 0.58 | 0.63 | 0.63 | 0.55 | 1.00 |  |  |  |  |  |  |  |  |
| HEAL | 0.56 | 0.55 | 0.69 | 0.61 | 0.61 | 0.64 | 0.51 | 1.00 |  |  |  |  |  |  |  |
| VIT | 0.56 | 0.56 | 0.76 | 0.72 | 0.70 | 0.63 | 0.59 | 0.80 | 1.00 |  |  |  |  |  |  |
| FRS | 0.43 | 0.41 | 0.63 | 0.64 | 0.65 | 0.58 | 0.44 | 0.54 | 0.61 | 1.00 |  |  |  |  |  |
| CRS | 0.48 | 0.39 | 0.58 | 0.59 | 0.57 | 0.52 | 0.48 | 0.52 | 0.57 | 0.63 | 1.00 |  |  |  |  |
| TRS | 0.61 | 0.48 | 0.62 | 0.62 | 0.56 | 0.56 | 0.48 | 0.55 | 0.56 | 0.53 | 0.61 | 1.00 |  |  |  |
| PEERRS | 0.43 | 0.31 | 0.43 | 0.45 | 0.40 | 0.42 | 0.41 | 0.40 | 0.38 | 0.33 | 0.44 | 0.48 | 1.00 |  |  |

Note. Factor Correlations among the 15 Well-being factors based on the non-Set Full-ESEM , Set-ESEM, and CFA (see Figure 4)

**Section 3.C: Higher-Order Factors Relating the 15 First-order Factors to Second-order and Third-order (Global) Well-being factors. Comparison of solutions with and without Constraints of Residuals**

|  |  | Original (no constraints on residuals) | | | | | | With constraints on residuals | | | | | |
| --- | --- | --- | --- | --- | --- | --- | --- | --- | --- | --- | --- | --- | --- |
|  |  | CFA |  | Set-ESEM | | Full-ESEM | | CFA |  | Set-ESEM | | FullESEM | |
|  |  | Est | SE | Est | SE | Est | SE | Est | SE | Est | SE | Est | `SE |
| Academic | Ssc | .92 | .02 | .90 | .03 | .99 | .05 | .92 | .02 | .90 | .03 | .99 | .05 |
|  | Ssa | .89 | .02 | .86 | .03 | .60 | .05 | .89 | .02 | .86 | .03 | .60 | .05 |
| Psychological | Hope | .91 | .01 | .88 | .03 | .86 | .04 | .92 | .01 | .92 | .02 | .86 | .04 |
|  | Posem | .89 | .02 | .81 | .03 | .80 | .03 | .89 | .02 | .83 | .03 | .81 | .02 |
| Self-Belief | Sew | .91 | .01 | .87 | .02 | .83 | .03 | .91 | .01 | .87 | .02 | .83 | .03 |
|  | Sep | .88 | .02 | .86 | .02 | .75 | .05 | .88 | .02 | .86 | .02 | .74 | .05 |
|  | Buoy | .72 | .03 | .70 | .03 | .71 | .04 | .72 | .03 | .70 | .03 | .71 | .04 |
| Physical | Vit | .95 | .02 | .93 | .02 | .99 | .04 | .95 | .02 | .93 | .02 | .99 | .04 |
|  | Heal | .85 | .02 | .88 | .02 | .69 | .04 | .86 | .02 | .88 | .02 | .68 | .04 |
| Relationships | Frs | .77 | .03 | .78 | .03 | .72 | .04 | .77 | .03 | .78 | .03 | .72 | .04 |
|  | Crs | .77 | .03 | .75 | .03 | .75 | .03 | .77 | .03 | .75 | .03 | .75 | .03 |
|  | Trs | .77 | .03 | .76 | .03 | .75 | .03 | .77 | .03 | .76 | .03 | .75 | .03 |
|  | Peers | .56 | .03 | .59 | .04 | .50 | .04 | .56 | .03 | .59 | .04 | .50 | .04 |
| Community | Ciai | .92 | .03 | .87 | .04 | .38 | .09 | .92 | .03 | .87 | .04 | .48 | .04 |
|  | Cici | .87 | .03 | .79 | .06 | 1.39 | .38 | .87 | .03 | .79 | .06 | 1.00 | .00 |
| Mean |  | .84 | .02 | .82 | .03 | .78 | .06 | .84 | .02 | .82 | .03 | .76 | .03 |
|  |  |  |  |  |  |  |  |  |  |  |  |  |  |
| Global | Acad | .78 | .02 | .79 | .03 | .66 | .04 | .78 | .02 | .79 | .03 | .66 | .04 |
|  | Psychwb | 1.00 | .01 | 1.02 | .02 | 1.00 | .03 | .99 | .00 | 1.00 | .00 | 1.00 | .00 |
|  | Self | .96 | .01 | .98 | .01 | .95 | .02 | .96 | .01 | .98 | .01 | .95 | .02 |
|  | Phwb | .87 | .02 | .87 | .02 | .82 | .03 | .87 | .02 | .87 | .02 | .82 | .03 |
|  | Rs | .91 | .02 | .91 | .02 | .90 | .02 | .91 | .02 | .91 | .02 | .91 | .02 |
|  | Ci | .57 | .03 | .59 | .03 | .30 | .07 | .57 | .03 | .59 | .03 | .40 | .03 |
| Mean |  | .85 | .02 | .86 | .02 | .77 | .04 | .85 | .02 | .86 | .02 | .79 | .02 |

Note. SE = standard error. Results from the completely standardized higher-order factor analyses relating the 15 first-order well-being factors to higher-order factors based on the CFA, Set-ESEM, and Full-ESEM solutions (also see Section 4 for syntax). In the second set of analyses, residual variance were all constrained to be non-negative ( >.01).

**Section 3.C (continued)**

In the initial analyses, none of these higher-order factor loadings was completely proper in that some of the standardized factor loadings were greater than 1.0, resulting in negative estimates of residual variances. Particularly for the Full-ESEM, the standardized second-order factor loading for the one of the factors is highly is problematic (1.35) with an extremely large standard error relative to those of the of the other factor loadings.

The problem with the higher-order factor structure is due in part, to fact that several of the second-order factors are defined by only two first-order factors and two-indicator factors are notoriously unstable. To address this problem, we re-configured the model using the Mplus "model constraint" function (Muthén & Muthén, 2015) to constrain all residual variance components to be greater than a small positive value (.01; see Mplus syntax in Section 3.D). With this added constraint all three solutions were fully proper, and standard errors were systematically smaller (See above for solutions within and without constrained residuals). These constraints had almost no effects on goodness of fit (Table 3.1), the higher-order factor loadings were nearly the same for the CFA and Set-ESEM solutions, and differed only slightly for the Full-ESEM solutions. Indeed, the pattern of results was even more similar across the three solutions when residuals were constrained to be non-negative. The imposition of these constraints also demonstrates that this feature of the traditional CFA model is also easily implemented in Set- and Full-ESEMs. We note that it would have also been possible to merely fix the offending parameters to zero or a small non-negative value. However, this model would have changed the df and distorted measures of fit.

**Section 3D: Mplus Syntax used to test Model B2* in Table 3.1 (also see parameter estimates in Table 3.3)**

TITLE: Higher-Order Set-ESEM Model Using EwC

DATA: FILE IS

GAT Primary+Secondary WB Mplus (R18OCT2017l).txt;

MISSING are all(-999);

USEVARIABLES ARE

SDQ_SS1 SDQ_SS2 SDQ_SS3

SDQ_SS4 SDQ_SS5 SDQ_SS6

ABUOY_1 ABUOY_2 ABUOY_3 ABUOY_4

SDT_F1 SDT_F2 SDT_F3 ! SDT_F4

SDT_C1 SDT_C2 SDT_C3 ! SDT_C4

SDT_T1 SDT_T2 SDT_T3 !SDT_T4

PEER_1 PEER_3 PEER_4 ! PEER_2

HEAL_2 HEAL_3 HEAL_4

VIT_1 VIT_2 VIT_3 VIT_4

HOP_1 HOP_2 WB_1 HOP_3

P_PA_1 P_PA_2 P_PA_3

SDQ_SE1 SDQ_SE2 SDQ_SE3 SDQ_SE4

SDQ_SE5 SDQ_SE6 SDQ_SE7 SDQ_SE8

CI_AI1 CI_AI2 CI_AI3

CI_CI1 CI_CI2 CI_CI3 ;

ANALYSIS: ESTIMATOR = MLR; ROTATION = TARGET;

! Note Based on the EwC transformation of the Set-ESEM solution into an
! Equivalent CFA model, factor loadings (FL) from the Set-ESEM solution are
! Used as starting values for the EwC (CFA) model with necessary constraints
! for the model to be identified and equivalent to the Set-ESEM model (see earlier
! discussion of EwC)

MODEL:

ssc BY sdq_ss1@0.89437 (FL1) ;

ssc BY sdq_ss20.74715 (FL2) ;

ssc BY sdq_ss30.94525 (FL3) ;

ssc BY sdq_ss4@0.17525 (FL4) ;

ssc BY sdq_ss5-0.08329 (FL5) ;

ssc BY sdq_ss6-0.03272 (FL6) ;

ssa BY sdq_ss4@0.64344 (FL7) ;

ssa BY sdq_ss50.87275 (FL8) ;

ssa BY sdq_ss60.86559 (FL9) ;

ssa BY sdq_ss1@-0.01772 (FL10) ;

ssa BY sdq_ss20.11387 (FL11) ;

ssa BY sdq_ss3-0.04111 (FL12) ;

hope BY hop_1@0.69191 (FL13) ;

hope BY hop_20.68247 (FL14) ;

hope BY wb_10.62609 (FL15) ;

hope BY hop_30.72532 (FL16) ;

hope BY p_pa_1@0.18533 (FL17) ;

hope BY p_pa_2-0.13731 (FL18) ;

hope BY p_pa_30.08180 (FL19) ;

posem BY p_pa_1@0.70669 (FL20) ;

posem BY p_pa_21.03121 (FL21) ;

posem BY p_pa_30.73702 (FL22) ;

posem BY hop_1@-0.12387 (FL23) ;

posem BY hop_2-0.00859 (FL24) ;

posem BY wb_10.22808 (FL25) ;

posem BY hop_3-0.00991 (FL26) ;

sew BY sdq_se10.33969 (FL27) ;

sew BY sdq_se20.86287 (FL28) ;

sew BY sdq_se30.80145 (FL29) ;

sew BY sdq_se4@0.92031 (FL30) ;

sew BY sdq_se50.21112 (FL31) ;

sew BY sdq_se60.09340 (FL32) ;

sew BY sdq_se7@0.03030 (FL33) ;

sew BY sdq_se8-0.02087 (FL34) ;

sew BY abuoy_1-0.10197 (FL35) ;

sew BY abuoy_20.08725 (FL36) ;

sew BY abuoy_3-0.03220 (FL37) ;

sew BY abuoy_4@0.04245 (FL38) ;

sep BY sdq_se50.50215 (FL39) ;

sep BY sdq_se60.60357 (FL40) ;

sep BY sdq_se7@0.78927 (FL41) ;

sep BY sdq_se80.78135 (FL42) ;

sep BY sdq_se10.37345 (FL43) ;

sep BY sdq_se2-0.01016 (FL44) ;

sep BY sdq_se30.00305 (FL45) ;

sep BY sdq_se4@-0.05735 (FL46) ;

sep BY abuoy_1-0.02719 (FL47) ;

sep BY abuoy_2-0.05084 (FL48) ;

sep BY abuoy_30.24531 (FL49) ;

sep BY abuoy_4@-0.12098 (FL50) ;

abuoy BY abuoy_10.79098 (FL51) ;

abuoy BY abuoy_20.70815 (FL52) ;

abuoy BY abuoy_30.57294 (FL53) ;

abuoy BY abuoy_4@0.82479 (FL54) ;

abuoy BY sdq_se10.06863 (FL55) ;

abuoy BY sdq_se2-0.00395 (FL56) ;

abuoy BY sdq_se30.03945 (FL57) ;

abuoy BY sdq_se4@-0.02011 (FL58) ;

abuoy BY sdq_se50.05501 (FL59) ;

abuoy BY sdq_se60.04899 (FL60) ;

abuoy BY sdq_se7@-0.02715 (FL61) ;

abuoy BY sdq_se80.07544 (FL62) ;

heal BY heal_20.64543 (FL63) ;

heal BY heal_3@0.95851 (FL64) ;

heal BY heal_40.60358 (FL65) ;

heal BY vit_10.27842 (FL66) ;

heal BY vit_20.01666 (FL67) ;

heal BY vit_30.19112 (FL68) ;

heal BY vit_4@-0.18869 (FL69) ;

vit BY vit_10.53900 (FL70) ;

vit BY vit_20.80707 (FL71) ;

vit BY vit_30.37261 (FL72) ;

vit BY vit_4@1.02402 (FL73) ;

vit BY heal_20.19130 (FL74) ;

vit BY heal_3@-0.08230 (FL75) ;

vit BY heal_40.11115 (FL76) ;

frs BY sdt_f1@0.85252 (FL77) ;

frs BY sdt_f20.82254 (FL78) ;

frs BY sdt_f30.78268 (FL79) ;

frs BY sdt_c1@-0.00578 (FL80) ;

frs BY sdt_c20.03655 (FL81) ;

frs BY sdt_c3-0.02151 (FL82) ;

frs BY sdt_t1@0.01665 (FL83) ;

frs BY sdt_t2-0.01135 (FL84) ;

frs BY sdt_t30.00190 (FL85) ;

frs BY peer_10.01407 (FL86) ;

frs BY peer_30.05527 (FL87) ;

frs BY peer_4@-0.06738 (FL88) ;

crs BY sdt_c1@0.90582 (FL89) ;

crs BY sdt_c20.79949 (FL90) ;

crs BY sdt_c30.85553 (FL91) ;

crs BY sdt_f1@-0.00396 (FL92) ;

crs BY sdt_f20.04585 (FL93) ;

crs BY sdt_f3-0.03292 (FL94) ;

crs BY sdt_t1@0.01399 (FL95) ;

crs BY sdt_t20.00697 (FL96) ;

crs BY sdt_t3-0.01949 (FL97) ;

crs BY peer_1-0.01889 (FL98) ;

crs BY peer_3-0.01030 (FL99) ;

crs BY peer_4@0.02735 (FL100) ;

trs BY sdt_t1@0.83361 (FL101) ;

trs BY sdt_t20.89508 (FL102) ;

trs BY sdt_t30.84957 (FL103) ;

trs BY sdt_f1@0.03592 (FL104) ;

trs BY sdt_f2-0.01457 (FL105) ;

trs BY sdt_f3-0.01365 (FL106) ;

trs BY sdt_c1@0.01069 (FL107) ;

trs BY sdt_c2-0.02689 (FL108) ;

trs BY sdt_c30.01624 (FL109) ;

trs BY peer_1-0.00248 (FL110) ;

trs BY peer_3-0.01610 (FL111) ;

trs BY peer_4@0.02316 (FL112) ;

peers BY peer_10.79125 (FL113) ;

peers BY peer_30.77754 (FL114) ;

peers BY peer_4@0.81684 (FL115) ;

peers BY sdt_f1@-0.01120 (FL116) ;

peers BY sdt_f20.03188 (FL117) ;

peers BY sdt_f3-0.02023 (FL118) ;

peers BY sdt_c1@-0.00782 (FL119) ;

peers BY sdt_c20.03807 (FL120) ;

peers BY sdt_c3-0.02794 (FL121) ;

peers BY sdt_t1@0.02831 (FL122) ;

peers BY sdt_t2-0.01202 (FL123) ;

peers BY sdt_t3-0.01062 (FL124) ;

ciai BY ci_ai1@0.81262 (FL125) ;

ciai BY ci_ai20.79772 (FL126) ;

ciai BY ci_ai30.55366 (FL127) ;

ciai BY ci_ci10.25166 (FL128) ;

ciai BY ci_ci2@-0.20783 (FL129) ;

ciai BY ci_ci30.23710 (FL130) ;

cici BY ci_ci10.37716 (FL131) ;

cici BY ci_ci2@1.06847 (FL132) ;

cici BY ci_ci30.59961 (FL133) ;

cici BY ci_ai1@0.03387 (FL134) ;

cici BY ci_ai20.01703 (FL135) ;

cici BY ci_ai30.13889 (FL136) ;

SSC-cici WITH SSC-cici@0;

acad by SSc ssa ;

psychwb by hope posem ;

SELF by sew sep abuoy;

Phwb by vit heal ;

rs by frs crs trs peerRS;

CI by CIAI CICI;

gwb by acad psychwb SELF phwb rs CI;

ssc-cici (resid1-resid15);

acad psychwb SELF phwb rs CI (resid16-resid21);

! Note: Residuals for all first- and second-order factors are constrained

! to be non-negative.

model constraint:

resid1 > .01; resid2 > .01; resid3 > .01; resid4 > .01; resid5 > .01;

resid6 > .01; resid7 > .01; resid8 > .01; resid9 > .01; resid10 > .01;

resid11 > .01; resid12 > .01; resid13 > .01; resid14 > .01;

resid15 > .01; resid16 > .01; resid17 > .01; resid18 > .01; resid19 > .01;

resid20 > .01; resid21 > .01;

OUTPUT: sampstat stdyx TECH1 tech4 sval;!ODINDICES (ALL);

**Section 4. Supplemental Materials Based on the Marsh, Nagengast et al. (2011) Study**

In Section 4 we present in greater detail the rationale and results of our reanalysis of the Marsh, Nagengast et al. (2011), but the reader should refer to the original article for further detail – particularly in relation to the substantive implications of the research. Briefly, the 6-factor Adolescent Peer Relations Instrument (APRI) was designed to measure three bully (verbal, social, physical) factors and three victim (verbal, social, physical) factors. Although there is good theoretical support for these six factors, previous research had not identified well differentiated facets of these constructs that met standards of good measurement: goodness-of-fit, measurement invariance, lack of differential item functioning, and well differentiated factors that were not so highly correlated as to detract from their discriminant validity and substantive usefulness in school settings. The reader is referred to the original study for more detail in relation to the substantive issues. As described in the main text, Marsh, Nagengast et al. did not specifically refer to their ESEM as Set-ESEM and did not actually consider a Full-ESEM. We begin with a summary of the parameter estimates based on the three models: CFA (see Figure 5A; also see figure 1A in main text), Set-ESEM (see Figure 5B, also see Figure 1B in main text), Full-ESEM (see Figure 5C, also see Figure 1C in main text). The goodness-of-fit values for these models are presented in the main text (Table 4C in Supplemental Materials).

Here, however, we focus on the Set-ESEM introduced in this study as a particularly heuristic application. More specifically, Marsh, Nagengast et al. (2011) used Set-ESEM, noting the importance of separating the three bully factors from the three victim factors. This was accomplished by treating the three bully factors as one set of Set-ESEM factors and the three victim factors as a second set of Set-ESEM factors. Thus, in their Set-ESEM, items designed to measure the three bully factors were allowed to cross-load on each of the bully factors, and the items designed to measure the three victim factors were allowed to cross-load in the three victim factors. However, the items from the bully factors were not allowed to load on the victim factors and items from the victim factors were not allowed to load in the bully factors. We begin by juxtaposing the CFA (Figure 5A), Set-ESEM (Figure 5B), and (non-Set) Full-ESEM (Figure 5C) models.

**13-Model Taxonomy of Invariance.**

Marsh et al. (2009) proposed a taxonomy of 13 ESEMs models (see Section 4.B) designed to test measurement invariance that integrates traditional CFA and IRT approaches that can easily be extended to longitudinal invariance (also see Marsh, et al., 2014). This demonstrates the flexibility of ESEM to incorporate many features typically associated with CFA that are not easily accommodated by traditional EFA models. Our reanalysis of the Marsh, Nagengast et al. (2011) study emphasizes how this taxonomy is easily extended to include Set-ESEM based on longitudinal data (invariance over time) or multiple groups (invariance over gender).

**Multitrait-Multimethod (MTMM) Analysis of Convergent and Discriminant Validity**

The multitrait-multimethod (MTMM; Campbell & Fiske, 1959) design is used widely to assess convergent and discriminant validity, and is a standard criterion for evaluating psychological instruments. The MTMM design provides a particularly strong approach to evaluating stability of responses to a multidimensional instrument, as emphasized by Campbell and O’Connell (1967) who specifically operationalized the multiple methods in their MTMM paradigm as multiple occasions. Marsh (Marsh, Ellis et al., 2005; Marsh, Martin & Jackson, 2010) also recommended this approach to evaluate support for the convergent and discriminant validity in relation to temporal stability over time. In this regard, convergent validities refer to stability over time (i.e., test-retest correlations) and the "method" factor is time. Although the design might be considered weak in relation to providing support for convergence based on maximally different methods (e.g., multiple respondents – self, peer, teacher; multiple instruments designed to measure the same traits), it provides a "best case" test in relation to discriminant validity. Thus, if there is not support for discriminant validity in relation to convergent validity based on time as the method factor, support for discriminant validity is unlikely to be found with other, more demanding tests of convergent validity.

Although Campbell and Fiske’s original guidelines are still widely used to evaluate MTMM data, important problems with their guidelines are well known (see reviews by Marsh, 1988, 1993; Marsh & Grayson, 1995). Ironically, even in highly sophisticated CFA approaches to MTMM data, a single scale score—often an average of multiple items—is typically used to represent each trait–method combination. Marsh (1993; Marsh & Hocevar, 1988), however, argued that it is stronger to incorporate the multiple indicators explicitly into the MTMM design. When multiple indicators are used to represent each scale, CFAs and ESEMs at the item level results in a MTMM matrix of latent correlations, thereby eliminating many of the objections to the Campbell–Fiske guidelines. We argue that because our analysis starts with a latent correlation matrix in which factors are represented by multiple factors, our approach overcomes most of the limitations widely attributed to the original Campbell-Fiske guidelines. For this reason, the actual summary of the MTMM results based on the latent MTMM correlation matrix better represents the logic and intuitive appeal of the original Campbell-Fiske guidelines than do most current approaches to MTMM data. Marsh, Nagengast et al. (2011) applied this approach with both CFA and Set-ESEM to test the hypothesis that support for discriminant validity is stronger for Set-ESEM than CFA.

In the text we provide only a superficial coverage of our extension of our MTMM analysis. In particular, the application of the MTMM logic here is somewhat more complicated than in the typical MTMM design has two facets (traits and methods). However, here there is a three facet design: trait domain (bully and victim); trait subdomain (verbal, social, and physical); and method (represented by the three occasions). Thus, there are actually are two distinct “instruments” (bully and victim), each containing verbal, social, and physical subdomains. However, for example, the physical bullying factor is clearly a different construct than the physical victimization factor. Also, whilst the three time waves are considered as method factors, it is reasonable to assume that relations between matching factors should be higher for adjacent time points (e.g., physical-bullying at T1 and T2, or at T2 and T3) than at non-adjacent time points (e.g., physical-bullying at T1 and T3). Consistent with these various distinctions, Marsh, Nagengast et al. (2011) classified correlations into 11 categories (rather than the four used by Campbell and Fiske) based on various combinations of traits, time (near or far comparisons), and instruments (same or different) as depicted in Section 4.C and 4.D.

Consistent with results from the Set-ESEM models based on a single wave of data, the fit of the CFA model positing strong factorial invariance over time (factor loadings and intercepts invariant) was reasonable (CFI=.937, TLI=.935, RMSEA = .020) but not as good as the corresponding Set-ESEM model (CFI=.961, TLI=.959, RMSEA = .016). The critical issue here is to test the a priori prediction that support for the discriminant validity for the CFA model is substantially poorer than for the Set-ESEM model. Because we had already shown that the traditional Full-ESEM solution confounded bully and trait factors that was the critical distinction in the MTMM analyses, this model was not evaluated as part of the MTMM analyses

For both the CFA and Set-ESEM results there is good support for convergent validity (stability over time), particularly for adjacent time points. Although support for convergent validity is slightly higher for the CFA model than the corresponding Set-ESEM model (.624 vs. .616 for “near” convergent validities in category a, .490 vs. .481 for “far” convergent validities in category b), these differences are very small.

In the most demanding test of discriminant validity in the MTMM approach, convergent validities are compared to correlations among different traits measured with the same method (or same occasion and same instrument here). Whilst there is reasonable support for the discriminant validity of Set-ESEM factors (mean convergent validity in category a = .616, compared to mean comparison correlations in category c = .525), there is a complete lack of support for the discriminant validity based on the CFA factors (mean convergent validity in category a = .624, compared to mean comparison correlation in category c = .818).

Support for discriminant validity of the APRI factors varies depending upon whether comparison correlations are based on different factors collected at the same time (category c), adjacent “near” times (category d), or non-adjacent “far” times (category e), and whether convergent validities are based on convergence of same traits administered in adjacent “near” times or non-adjacent “far” times. However, across all combinations of these convergent validities and comparison correlations, the support for the discriminant validity is systematically stronger for Set-ESEM factors than CFA factors (Section 4.C and 4.D). In summary, these results support the convergent and discriminant validity of the Set-ESEM factors and provide clear evidence for our claim that Set-ESEM factors are substantially better than the corresponding CFA factors in terms of discriminant validity.

**Construct Validity: Relation to other Constructs.**

In order to evaluate the construct validity of the APRI responses, Marsh, Nagengast et al. (2011) related the six Set-ESEM factors to a diverse set of other psycho-social variables specifically designed to address key questions about the nature of bullying. Results (Table 4.2 in main text) and a brief summary of their interpretation are presented in the main text (see Marsh, Nagengast et al., 2011, for further detail). In Section 4.F we present a more detailed description of the other psycho-social variables used to validate the APRI.


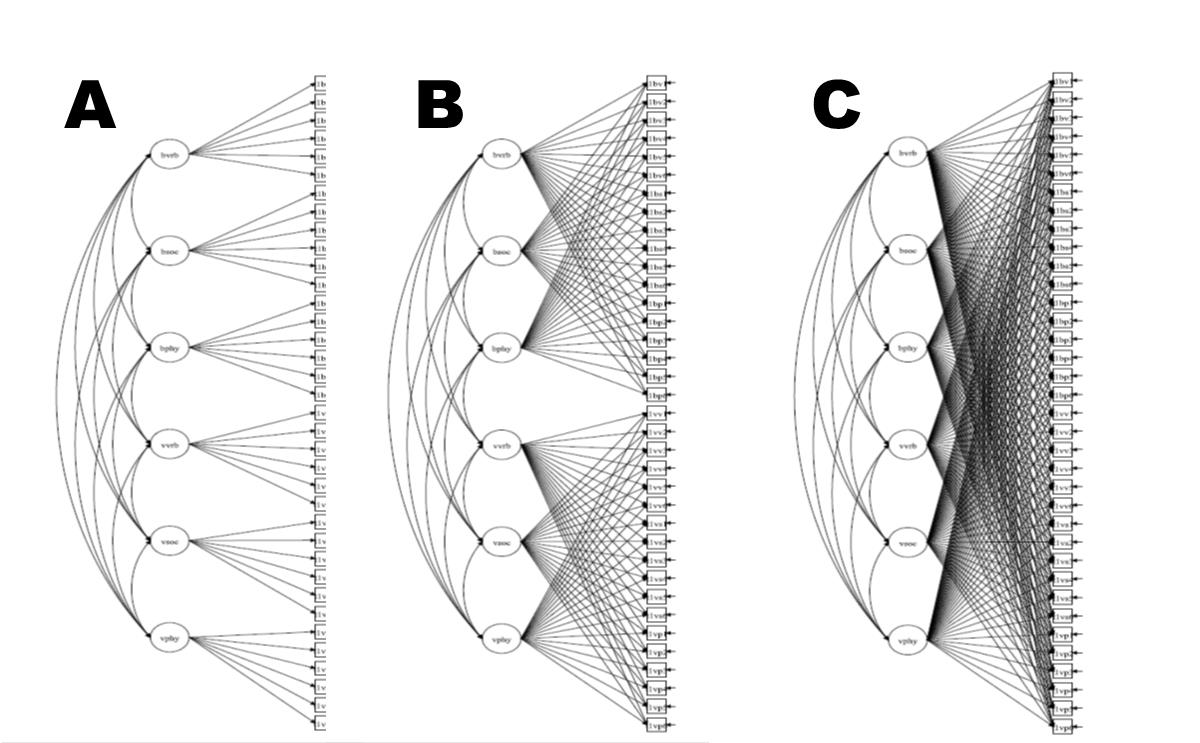


Figure 4.1 Study 4. Path Diagrams of CFA (A), Set-ESEM (B), and Full-ESEM (C). In each of the models there are three bully factors (physical, social, and verbal) and three victim factors (physical, social, and verbal). In the CFA model, each item loads on one and only one factor. In the Set-ESEM model, all bully items load on the three bully factors and all victim items load on the three victim factor. In the Full-ESEM model, all item load on all factors. Note that path diagram figures are only intended to be illustrative as providing detailed labels would make the diagrams too large to present.

A

B

Figure 4.2 Study 4. Path Diagrams of CFA (A) and Set-ESEM (B) models of longitudinal data. These longitudinal models build on the models for a single wave (Figure 4.1). In each of the models there are three bully factors (physical, social, and verbal) and three victim factors (physical, social, and verbal) measured across three waves. In the CFA model, each item loads on only one factor. In the Set-ESEM model, all bully items load on the three bully factors in the same wave and all victim items load on the three victim factor in the same wave. However, items from one wave do not cross-load on factors from different waves. Note that path diagram figures are only intended to be illustrative as providing detailed labels would make the diagrams too large to present.

**Section 4.A: Factor Structures: Set-ESEM, CFA, and non-Set Full-ESEM**

SET-ESEM factor solution ICM–CFA solution Full-ESEM factor solution (no SET)

Factor loading Factor loading Factor loading

Bully Victim Bully Victim

Factor/model Verbal Social Physical Verbal Social Physical *R*2 *R*2 Verbal Social Physical Verbal Social Physical *R*2

Bully–verbal

BV1 .**66 .**03 .14 .57 .**74 .**54 **.65** .01 .15 .04 .02 .02 .57

BV2 .**64 .**06 .21 .64 .**80 .**63 **.66** .04 .19 .00 .04 .02 .65

BV3 .**70 .**11 .04 .60 .**75 .**56 **.70** .10 .03 .04 .00 -.01 .60

BV4 .**48 .**08 .31 .55 .**74 .**55 **.47** .09 .31 .08 -.02 .00 .55

BV5 .**43 .**30 .14 .50 .**70 .**49 **.44** .31 .11 .01 -.02 .03 .50

BV6 .**69 .**16 .07 .67 .**81 .**66 **.67** .17 .07 .08 -.02 .01 .66

Bully–social

BS1 .08 .**59 .**08 .46 .**67 .**45 .09 **.59** .08 .01 .01 .01 .45

BS2 .05 .**53 .**23 .48 .**70 .**49 .05 **.53** .23 -.01 .06 -.01 .49

BS3 .04 .**58 .**08 .40 .**62 .**38 .04 **.58** .07 .01 -.03 .02 .40

BS4 .04 .**72 .**01 .55 .**70 .**50 .04 **.70** .03 .00 .00 .02 .54

BS5 .14 .**51 .**11 .41 .**66 .**43 .14 **.49** .12 -.03 .07 -.01 .41

BS6 .20 .**46 .**06 .37 .**61 .**38 .18 **.44** .09 .03 .06 -.07 .36

Bully**–**physical

BP1  .25 .02 .**56 .**53 .**72 .**53 .26 .03 **.53** -.01 .00 .09 .54

BP2  .20 .19 .**45 .**48 .**71 .**50 .21 .20 **.44** -.01 -.01 .03 .49

BP3  -.06 .20 .**56 .**41 .**60 .**36 -.02 .22 **.50** -.03 .04 .05 .39

BP4  .09 .04 .**68 .**55 .**72 .**52 .12 .08 **.61** .03 -.05 .04 .53

BP5  .19 .09 .**58 .**56 .**76 .**58 .23 .12 **.52** -.03 -.04 .09 .55

BP6  .09 .13 .**57 .**49 .**69 .**47 .10 .15 **.56** .03 .04 .01 .49

Victim–verbal

VV1 .**74 .**00 .14 .66 .**79 .**61 .01 -.04 .09 **.73** .09 .05 .67

VV2 .**65 .**10 .18 .67 .**81 .**65 .07 -.05 .10 **.62** .21 .08 .67

VV3 .**67 .**20 .08 .71 .**84 .**70 .04 .03 .00 **.66** .21 .07 .71

VV4 .**59 .**20 .10 .61 .**79 .**62 .03 .05 -.05 **.59** .16 .14 .61

VV5 .**46 .**28 .24 .66 .**81 .**66 .06 .06 -.07 **.46** .20 .31 .67

VV6 .**72 .**14 .08 .72 .**85 .**72 .06 .02 -.06 **.72** .09 .13 .73

Victim–social

VS1 .19 .**54 .**09 .52 .**73 .**53 -.07 -.04 .11 .16 **.65** .03 .58

VS2 .16 .**60 .**01 .49 .**69 .**47 .03 -.02 .02 .10 **.69** -.03 .54

VS3 .16 .**68 .**05 .64 .**78 .**61 .00 .05 -.03 .13 **.66** .10 .64

VS4 .06 .**64 .**12 .56 .**73 .**54 .00 .06 -.05 .04 **.60** .18 .55

VS5 .24 .**42 .**26 .58 .**76 .**58 .02 .14 -.09 .25 **.30** .36 .60

VS6 .02 .**56 .**28 .57 .**74 .**55 .04 .05 -.11 .02 **.45** .39 .57

Victim–physical

VP1 .22 -.04 .**66 .**59  .**74 .**55 -.05 -.08 .23 .24 .05 **.51** .56

VP2 .08 .06 .**71 .**61  .**76 .**58 -.03 -.04 .20 .12 .10 **.60** .59

VP3 .20 .11 .**57 .**58  .**77 .**59 -.02 .00 .10 .23 .12 **.52** .57

VP4 .03 .33 .**52 .**58  .**75 .**57 .02 .07 -.01 .05 .23 **.58** .60

VP5 .11 .15 .**62 .**60  .**78 .**60 .08 .00 .05 .11 .11 **.62** .61

VP6 .07 .23 .**57 .**57  .**75 .**57 .05 .03 .02 .08 .16 **.61** .58

Factor correlations (ICM–CFA above diagonal, ESEM below)

Bully–verbal 1.0 .72 .83 .27 .14 .27 1.00

Bully–social .42 1.0 .73 .17 .18 .22 .43 1.00

Bully–physical .53 .44 1.0 .21 .13 .34 .51 .41 1.00

Victim–verbal .27 .08 .15 1.0 .84 .81 .15 .05 .09 1.00

Victim–social .05 .17 .01 .43 1.0 .83 .04 .11 .02 .53 1.00

Victim–phys .22 .15 .38 .51 .52 1.0 .10 .08 .19 .50 .53 1.00

Note.The exploratory structural equation model (ESEM) solution was based on the 18 items from the bully instrument and 18 items from the victim instrument (see Model TG–ESEM in Section 4C for goodness-of-fit statistics). For both ESEM and independent clusters model–confirmatory factory analysis (ICM–CFA) solutions, all parameter estimates are standardized and a priori target loadings designed to measure each factor are in bold. In order to conserve space, we present the CFA factor loadings in condensed format such that only the target loading relating each item to its a priori factor is presented (as all nontarget loadings are zero). BV = bully–verbal; BS = bully–social; BP = bully–physical; VV = victim–verbal; VS = verbal–social; VP= verbal–physical

**Section 4.B**

**13-Model Taxonomy of Invariance Tests**

| Model | Parameters Constrained to Be Invariant |
| --- | --- |
| 1 | none (configural invariance) |
| 2 | FL [1] (metric or weak factorial/measurement invariance) |
| 3 | FL Uniq [1, 2] |
| 4 | FL, FVCV [1, 2] |
| 5 | FL, Inter [1, 2] (Scalar or Strong factorial/measurement invariance) |
| 6 | FL, Uniq, FVCV [1, 2, 3, 4] |
| 7 | FL, Uniq, Inter [1, 2, 3, 5] (Strict factorial/measurement invariance) |
| 8 | FL, FVCV, Inter [1, 2, 4, 5] |
| 9 | FL, Uniq, FVCV, Inter [1-8] |
| 10 | FL, Inter, FMn [1, 2, 5] (Latent mean invariance) |
| 11 | FL, Uniq, Inter, FMn [1, 2, 3, 5, 7, 10] (Manifest mean invariance) |
| 12 | FL, FVCV, Inter, FMn [1, 2, 4, 5, 6, 8, 10] |
| 13 | FL, Uniq, FVCV, Inter, FMn [1-12] (complete factorial invariance) |

Note. FL= Factor Loadings; FVCV=Factor variance-covariances; Inter = item intercepts; Uniq = item uniquenesses; FMn = Factor Means. Models with latent factor means freely estimated constrain intercepts to be invariant across groups, whilst models where intercepts are free imply that mean differences are a function of intercept differences. Brackets values represent nesting relations in which the estimated parameters of the less general model are a subset of the parameters estimated in the more general model under which it is nested. All models are nested under model 1 (with no invariance constraints) whilst model 13 (complete invariance) is nested under all other models.

**Section 4.C: Goodness-of-Fit Indices for 13 Invariance Models: Multigroup (over gender) and Over Time**

Model _2 *df* CFI TLI Parms RMSEA _2 *df* CFI TLI Parms RMSEA Invariance constraints

Total group analysis—Wave 1

TG–CFA 2311 579 .943 .938 123 .029 None

TG–ESEM 1533 429 .964 .947 273 .027 no SET

TG–ESEM 1642 519 .963 .955 183 .025 SET

Multiple-group gender invariance—Wave 1 Invariance over Time —Waves 1–3

MGT–M0 13561 5337 .941 .936 657 .019 None no CUs

MGG–M1 2212 1038 .960 .952 366 .025 10559 5229 .962 .958 765 .016 None

MGG–M2 2414 1128 .957 .951 276 .025 10748 5409 .962 .959 585 .016 FL

MGG–M3 4474 1164 .888 .879 240 .04 11487 5481 .957 .955 513 .016 FL, Unq

MGG–M4 3053 1149 .936 .929 255 .031 11490 5451 .957 .954 543 .016 FL, FVCV

MGG–M5 2519 1158 .954 .950 246 .026 10900 5469 .961 .959 525 .016 FL, INT

MGG–M6 5213 1185 .864 .855 219 .044 12281 5523 .952 .949 471 .017 FL, Unq, FVCV

MGG–M7 4604 1194 .885 .878 210 .04 11641 5541 .956 .954 453 .016 FL, Unq, INT

MGG–M8 3161 1179 .933 .928 225 .031 11645 5511 .956 .954 483 .017 FL, FVCV, INT

MGG–M9 5347 1215 .860 .855 189 .044 12438 5583 .951 .949 411 .017 FL, Unq, FVCV, INT

MGG–M10 2803 1164 .945 .940 240 .028 11099 5481 .960 .958 513 .016 FL, INT, FMn

MGG–M11 4879 1200 .876 .869 204 .042 11835 5553 .955 .953 441 .017 FL, Unq, INT, FMn

MGG–M12 3505 1185 .922 .917 219 .033 11820 5523 .955 .953 471 .017 FL, FVCV, INT, FMn

MGG–M13 5662 1221 .850 .845 183 .046 12609 5595 .950 .948 399 .018 FL, Unq, FVCV, INT, FMn

Note.See Section 4B for a description of the models (M1–M13). CFI = comparative fit index; TLI = Tucker–Lewis index; No. FParm = number of free parameters; RMSEA = root-mean-square error of approximation; TG = total group; CFA = confirmatory factory analysis; ESEM = exploratory structural equation modeling; MMG = multiple-group gender; MGY = multiple-group year; MGT= multiple-group time. For multiple group invariance models, the

parameters constrained to be invariant across the multiple groups (or multiple times for the longitudinal data) are FL = factor loadings; Unq = item uniquenesses; FVCV = factor variance– covariances; INT = item intercepts; FMn = factor means; CWCU = cross-wave-correlated uniquenesses.

**Section 4.D: Multi-Trait Multi-Method (MTMM) Matrix of Correlations: set-ESEM above the main diagonal, CFA Below the Main Diagonal (Type of Correlation in parentheses)**

**Time 1 Time 2 Time 3 _**

**Bully Victim Bully Victim Bully Victim _**

**BV BS BP VV VS VP BV BS BP VV VS VP BV BS BP VV VS VP _**

Time 1

BV**1** .47c .53c .27f .05i .21i .67a .34d .41d .20g .06j .20j .57b .26e .35e .19h .07k .15k

BS .73c **1** .48c .10i .16f .18i .32d .54a .32d .08j .17g .16j .28e .35b .25e .10k .13h .14k

BP .83c .73c **1** .16i .01i .39f .36d .29d .67a .11j .02j .35g .30e .24e .56b .14k .10k .33h

VV .26f .16i .21i **1** .53c .53c .20g .09j .15j .62a .33d .40d .16h .07k .13k .52b .26e .29e

VS .15i .18f .14i .84c **1** .40c -.03j .14g .04j .35d .54a .38d -.02k .08h .03k .30e .38b .27e

VP .27i .22i .34f .81c .83c **1** .15j .17j .38g .38d .39d .68a .16k .16k .33h .33e .31e .52b

Time 2

BV .67a .48d .57d .20g .10j .22j **1** .40c .51c .28f .00i .22i .65a .29d .38d .24g .04j .16j

BS .46d .57a .44d .14j .15g .19j .74c **1** .56c .12i .28f .28i .28d .49a .26d .13j .23g .23j

BP .57d .47d .67a .18j .13j .31g .86c .77c **1** .16i .12i .51f .37d .33d .66a .18j .16j .41g

VV .21g .14j .17j .64a .54d .56d .29f .23i .26i **1** .53c .56c .18g .05j .12j .65a .35d .36d

VS .13j .18g .13j .52d .59a .55d .19i .29f .24i .85c **1** .57c .00j .15g .05j .34d .52a .37d

VP .24j .19j .30g .56d .56d .68a .33i .31i .44f .84c .84c **1** .17j .21j .37g .41d .39d .62a

Time 3

BV .55b .39e .47e .16h .09k .20k .65a .45d .56d .19g .12j .25j **1** .38c .48c .27f .04i .19i

BS .34e .38b .34e .10k .11h .16k .43d .51a .44d .12j .16g .21j .78c **1** .64c .18i .42f .40i

BP .46e .36e .54b .15k .11k .26h .54d .40d .62a .17j .14j .31g .87c .82c **1** .22i .25i .56f

VV .20h .14k .20k .52b .43e .46e .27g .21j .26j .64a .52d .56d .35f .33i .36i **1** .50c .57c

VS .14k .15h .18k .40e .45b .42e .19j .25g .25j .53d .58a .56d .30i .43f .38i .86c **1** .66c

VP .21k .17k .30h .41e .41e .51b .28j .26j .38g .53d .51d .63a .39i .43i .52f .85c .89c **1** _

Note. BV=Bully Verbal, BS=Bully Social, BP=Bully Physical, VV=Victim Verbal, VS=Victim Social, VP=Victim Physical. The correlations shaded in grey are convergent validities (correlations between the same trait administered on different occasions when the method is time). Consistent with the design of the analysis, correlations are classified into 11 types represented by the superscripts a – k (see Section 4E for a description).

**Section 4.E: Summary of Multitrait Multimethod Correlations (11 categories based on extension to a three-facet design)**

| Type Trait Time Instrument | | Number of correlations | | ESEM | | CFA | |
| --- | --- | --- | --- | --- | --- | --- | --- |
| Convergent validities | |  | |  | |  | |
| A Same Near Same (MtHmMi–near) |  | | 12 | | 0.616 | | 0.624 | |
| B Same Far Same (MtHmMi–far) | | 6 | | 0.481 | | 0.49 | |
| Total |  | | 18 | | 0.568 | | 0.578 | |
| Comparison coefficients | |  | |  | |  | |
| C Different Same Same (HtMmMi) | | 18 | | 0.525 | | 0.818 | |
| Comparison coefficients | |  | |  | |  | |
| D Different Near Same (HtHmMi–near) |  | | 24 | | 0.351 | | 0.513 | |
| E Different Far Same (HtHmMi–far) | | 36 | | 0.288 | | 0.409 | |
| Matching bully and victim traits | | | |  | |  | |
| F Match Same Different (HtMmHi) | | 9 | | 0.351 | | 0.345 | |
| G Match Near Different (HtHmHi–near) | | 12 | | 0.328 | | 0.321 | |
| H Match Far Different (HtHmHi–far) |  | | 6 | | 0.202 | | 0.199 | |
| Nonmatching bully and victim traits | | | |  | |  | |
| I Different Same Different (HtMmHi) |  | | 18 | | 0.161 | | 0.271 | |
| J Different Near Different(HtHmHi–near) | | 27 | | 0.133 | | 0.198 | |
| K Different Far Different (HtHmHi–far) |  | | 12 | | 0.103 | | 0.157 | |
| Total |  | | 153 | | 0.299 | | 0.397 | |

Note.Each correlation from the extended multitrait multimethod matrix was classified into 11 types depending the trait, method (time), and instrument. Traits were the same (same trait, same instrument), different, or matching (matching traits from different instruments (e.g., bully–physical vs. victim–physical). Time was the same, near (T1 vs. T2 or T2 vs. T3) or far (T1 vs. T3). Instrument was the same (both bully or both victim) or different (bully vs. victim). MtHmMi–near = mono-trait hetero-method mono-instrument–near time; MtHmMi–far = mono-trait hetero-method mono-instrument– far time; HtMmMi) = hetero-trait mono-method mono-instrument; HtHmMi = hetero-trait hetero-method mono-instrument; HtMmHi = hetero-trait mono-method hetero-instrument; HtHmHi = hetero-trait hetero-method hetero-instrument.

**Section 4.F**

*Bully and Victim Factors: Relations with Other Constructs*

Bully Factors Victim Factors

1 2 3 4 5 6

**Bully Factors**

1 Verbal 1.0

2 Social .42 1.0

3 Physical .53 .44 1.0

**Victim Factors**

4 Verbal .27 .08 .15 1.0

5 Social .05 .17 .01 .43 1.0

6 Physical .22 .15 .38 .51 .52 1.0

**Participation Factors**

7 Active Reinf .45 .48 .52 .09 .09 .21

8 Vict Advocate -.33 -.15 -.19 .00 .08 -.06

9 Passive Reinf .38 .26 .24 .06 -.01 .04

10 Ignore -.10 -.05 -.15 -.03 .04 -.03

**Coping Styles Factors**

11 Avoidance .11 .17 .10 .25 .33 .23

12 Problem Solve -.13 -.02 -.08 -.04 -.02 -.01

13 Soc Support -.15 .03 -.22 -.03 .02 -.15

**Attitudes Factors**

14 Pro Bully .49 .39 .47 .08 .03 .16

15 Pro Victim -.27 -.20 -.34 .06 .04 -.07

**Locus Of Control Factors**

16 Internal -.06 -.15 -.18 -.01 -.07 -.08

17 External .16 .16 .08 .22 .26 .24

**Anger Management Factors**

18 Control -.19 -.12 -.20 -.11 -.05 -.09

19 Internalize .02 .04 -.06 .32 .33 .19

10 Externalize .30 .20 .29 .11 .09 .14

Depression

21 Depression .10 .14 .07 .38 .40 .26

**Non-Academic Self-Concept Factors**

22 Physical -.07 -.01 .01 -.11 -.03 -.02

23 Appearance -.01 .04 .10 -.13 -.08 .03

24 Opposite Sex .12 .09 .12 -.13 -.12 -.09

25 Same Sex -.07 -.03 -.04 -.35 -.39 -.32

26 Parent -.22 -.14 -.11 -.10 -.11 -.07

27 Honesty -.49 -.33 -.36 -.13 -.06 -.19

28 Emotional .06 -.07 .10 -.19 -.24 -.10

29 Esteem -.20 -.09 -.14 -.11 -.11 -.07

**Academic Self-Concept Factors**

30 Math -.11 -.09 -.09 -.07 -.09 -.04

31 Verbal -.15 -.10 -.21 -.06 -.06 -.06

32 Academic -.21 -.17 -.23 -.12 -.13 -.13

**Demographic Variables**

33 Sex -.23 -.03 -.38 -.11 .03 -.30

34 School Year .28 .05 .09 .08 -.02 .00

35 Yr-Sq -.14 -.02 -.07 -.13 -.09 -.09

36 Sex-Yr -.07 .03 -.09 -.02 .01 -.03

Note. The first 32 constructs are latent factors (based on multiple indicators, 168 items in total) from an ESEM
( r ≥ .04 is significant at p <.05). See Supplemental Materials Section 4F for a summary of the constructs related to the bully and victim factors

**Section 4.G**

**Summary Constructs In Table 2.3 in Main Text (Instrument Reliabilities and Item samples)**

**APRI Bullying Scales**

Bully Verbal (.89, .90, .92) 6 Items e.g.: Teased them by saying things to them;

Bully Social (.82, .86, .90) 6 Items e.g.: Got my friends to turn against a student;

Bully Physical (.85, .87, .90) 6 Items e.g.: Got into a physical fight with a student because I didn't like them

**APRI Victimization (Target of Bullying) Scales**

Victim Verbal (.92, .92, .93); 6 Items e.g.: I was teased by students saying things to me

Victim Social (.87, .91, .92); 6 Items e.g.: A student wouldn't be friends with me because

other people didn't like me

Victim Physical (.89, .89, .92); 6 Items e.g.: I was threatened to be physically hurt or harmed

**APRI-PR Participation Roles**

Role Active Reinforcer (.78, .86, .87); 6 Items e.g.: I would join in myself

Role Passive Reinforcer (.88, .90, .91); 6 Items e.g.: I would stay to watch what happens

Role Ignore (.87, .89, .91); 6 Items e.g.: I would pay no attention to it

Role Victim Advocate (.89, .91, .92); 6 Items e.g.: I would get my friends to help me stop it

**APRI-A Bully Attitudes**

Pro Bully (.64, .68, .74); 6 Items e.g.: It's OK to bully others if others are doing it Pro Victim (.68, .74, .79); 6 Items e.g.: People who are bullied deserve our help

**Coping Style**

Cope Avoidance (.75, .79, .83); 6 Items e.g.: I avoid the problem by spending more time alone

Cope Problem Solving (.85, .87, .89); 5 Items e.g.: I develop a plan about how to solve the problem before doing anything

Cope Seek Support (.90, .91, .92); 4 Items e.g.: I go to a friend for advice on how to solve the problem

**Locus Of Control**

LOC Internal (.75, .81, .85); 4 Items e.g.: My own efforts and actions are what will determine my future

LOC External (.71, .75, .78); 4 Items e.g.: External things mostly control my life

**AEI: Anger Expression**

Anger Control (.85, .87, .88); 4 Items e.g.: I stay steady and in control

Anger Internalise (.67, .69, .75); 4 Items e.g.: No one can tell but I am furious inside

Anger Externalise (.66, .68, .71); 4 Items e.g.: I let people see just how angry I am

**CDI- Short: Childhood Depression**

Depression (.83, .85, .76); 10 Items e.g.: I am sad once in a while; I am sad many times; I am sad all the time

**SDQ II Short: Self-Concept**

Physical (.83, .84, .84); 4 Items e.g.: I enjoy things like sports, gym and dance

Appearance (.87, .88, .89); 4 Items e.g.: I have a nice looking face

Opposite Sex Relations (.85, .84, .85); 4 Items e.g.: I am not very popular with members of the opposite sex

Same Sex Relations (.79, .82, .83); 5 Items e.g.: It is difficult to make friends with members of my own sex

Parent Relations (.84, .86, .85); 4 Items e.g.: I get along well with my parents

Honesty/Trustworthy (.79, .81, .81); 6 Items e.g.: I am honest

Emotional (.81, .83, .85); 5 Items e.g.: I worry more than I need to

General (.82, .84, .85); 6 Items e.g.: Overall I have a lot to be proud of

Math (.90, .90, .90); 4 Items e.g.: Mathematics is one of my best subjects

Verbal (.89, .90, .91); 5 Items e.g.: I am hopeless in English classes

School (.84, .86, .86); 4 Items e.g.: I get bad marks in most school subjects

Note. For each scale, the coefficient alpha estimates of reliability are presented for responses at Times 1, 2, and 3 respectively (in parentheses) along with the number of items and sample items from the scales.

**Section 4.H: Mplus syntax for Longitudinal Invariance Model 1 (no invariance)**

TITLE: Bully ESEM Model 1 (no invariance)

DATA: FILE is bylyw1w2w3_bullvic_21feb2010.dat;

VARIABLE:

NAMES ARE

id nsex nyr znyr znsex yrxsex ryrsq ryrxsex yrsqxsex ryr2xsex

T1BV1 T1BV2 T1BV3 T1BV4 T1BV5 T1BV6

T1BS1 T1BS2 T1BS3 T1BS4 T1BS5 T1BS6

T1BP1 T1BP2 T1BP3 T1BP4 T1BP5 T1BP6

T1VV1 T1VV2 T1VV3 T1VV4 T1VV5 T1VV6

T1VS1 T1VS2 T1VS3 T1VS4 T1VS5 T1VS6

T1VP1 T1VP2 T1VP3 T1VP4 T1VP5 T1VP6

T2BV1 T2BV2 T2BV3 T2BV4 T2BV5 T2BV6

T2BS1 T2BS2 T2BS3 T2BS4 T2BS5 T2BS6

T2BP1 T2BP2 T2BP3 T2BP4 T2BP5 T2BP6

T2VV1 T2VV2 T2VV3 T2VV4 T2VV5 T2VV6

T2VS1 T2VS2 T2VS3 T2VS4 T2VS5 T2VS6

T2VP1 T2VP2 T2VP3 T2VP4 T2VP5 T2VP6

T3BV1 T3BV2 T3BV3 T3BV4 T3BV5 T3BV6

T3BS1 T3BS2 T3BS3 T3BS4 T3BS5 T3BS6

T3BP1 T3BP2 T3BP3 T3BP4 T3BP5 T3BP6

T3VV1 T3VV2 T3VV3 T3VV4 T3VV5 T3VV6

T3VS1 T3VS2 T3VS3 T3VS4 T3VS5 T3VS6

T3VP1 T3VP2 T3VP3 T3VP4 T3VP5 T3VP6 ;

USEVARIABLES ARE T1BV1-T3VP6 ;

MISSING are all (0);

ANALYSIS:

ROTATION=geomin (OBLIQUE); ESTIMATOR=MLR;

PROCESSORS = 2;

model:

f1-f3 by T1BV1-T1BP6 (*1);

f4-f6 by T1VV1-T1VP6 (*2);

f7-f9 by T2BV1-T2BP6 (*3);

f10-f12 by T2VV1-T2VP6 (*4);

f13-f15 by T3BV1-T3BP6 (*5);

f16-f18 by T3VV1-T3VP6 (*6);

f1-f6 with f7-f12;

f1-f6 with f13-f18;

f7-f12 with f13-f18;

T1BV1-T1VP6 pwith T2BV1-T2VP6;

T1BV1-T1VP6 pwith T3BV1-T3VP6;

T2BV1-T2VP6 pwith T3BV1-T3VP6;

OUTPUT: TECH1; stdyx; mod;

**Section 4.I: Mplus syntax for Longitudinal Invariance Model 5 (factor loadings and intercepts invariant)**

TITLE: Bully ESEM M5 -- latent means free

DATA: FILE is bylyw1w2w3_bullvic_21feb2010.dat;

VARIABLE:

NAMES ARE

id nsex nyr znyr znsex yrxsex ryrsq ryrxsex yrsqxsex ryr2xsex

T1BV1 T1BV2 T1BV3 T1BV4 T1BV5 T1BV6

T1BS1 T1BS2 T1BS3 T1BS4 T1BS5 T1BS6

T1BP1 T1BP2 T1BP3 T1BP4 T1BP5 T1BP6

T1VV1 T1VV2 T1VV3 T1VV4 T1VV5 T1VV6

T1VS1 T1VS2 T1VS3 T1VS4 T1VS5 T1VS6

T1VP1 T1VP2 T1VP3 T1VP4 T1VP5 T1VP6

T2BV1 T2BV2 T2BV3 T2BV4 T2BV5 T2BV6

T2BS1 T2BS2 T2BS3 T2BS4 T2BS5 T2BS6

T2BP1 T2BP2 T2BP3 T2BP4 T2BP5 T2BP6

T2VV1 T2VV2 T2VV3 T2VV4 T2VV5 T2VV6

T2VS1 T2VS2 T2VS3 T2VS4 T2VS5 T2VS6

T2VP1 T2VP2 T2VP3 T2VP4 T2VP5 T2VP6

T3BV1 T3BV2 T3BV3 T3BV4 T3BV5 T3BV6

T3BS1 T3BS2 T3BS3 T3BS4 T3BS5 T3BS6

T3BP1 T3BP2 T3BP3 T3BP4 T3BP5 T3BP6

T3VV1 T3VV2 T3VV3 T3VV4 T3VV5 T3VV6

T3VS1 T3VS2 T3VS3 T3VS4 T3VS5 T3VS6

T3VP1 T3VP2 T3VP3 T3VP4 T3VP5 T3VP6 ;

USEVARIABLES ARE T1BV1-T3VP6 ;

MISSING are all (0);

ANALYSIS:

ROTATION=geomin (OBLIQUE, .5); ESTIMATOR=MLR;

PROCESSORS = 2;

model:

f1-f3 by T1BV1-T1BP6 (*T1 1);

f4-f6 by T1VV1-T1VP6 (*T2 2);

f7-f9 by T2BV1-T2BP6 (*T3 1);

f10-f12 by T2VV1-T2VP6 (*T4 2);

f13-f15 by T3BV1-T3BP6 (*T5 1);

f16-f18 by T3VV1-T3VP6 (*T6 2);

f1-f6 with f7-f12;

f1-f6 with f13-f18;

f7-f12 with f13-f18;

T1BV1-T1VP6 pwith T2BV1-T2VP6;

T1BV1-T1VP6 pwith T3BV1-T3VP6;

T2BV1-T2VP6 pwith T3BV1-T3VP6;

[f7-f18]; !latent means free at T2 T3

[T1BV1 ] (600) ;

[T1BV2 ] (601) ;

[T1BV3 ] (602) ;

[T1BV4 ] (603) ;

[T1BV5 ] (604) ;

[T1BV6 ] (605) ;

[T1BS1 ] (606) ;

[T1BS2 ] (607) ;

[T1BS3 ] (608) ;

[T1BS4 ] (609) ;

[T1BS5 ] (610) ;

[T1BS6 ] (611) ;

[T1BP1 ] (612) ;

[T1BP2 ] (613) ;

[T1BP3 ] (614) ;

[T1BP4 ] (615) ;

[T1BP5 ] (616) ;

[T1BP6 ] (617) ;

[T1VV1 ] (618) ;

[T1VV2 ] (619) ;

[T1VV3 ] (620) ;

[T1VV4 ] (621) ;

[T1VV5 ] (622) ;

[T1VV6 ] (623) ;

[T1VS1 ] (624) ;

[T1VS2 ] (625) ;

[T1VS3 ] (626) ;

[T1VS4 ] (627) ;

[T1VS5 ] (628) ;

[T1VS6 ] (629) ;

[T1VP1 ] (630) ;

[T1VP2 ] (631) ;

[T1VP3 ] (632) ;

[T1VP4 ] (633) ;

[T1VP5 ] (634) ;

[T1VP6 ] (635) ;

[T2BV1 ] (600) ;

[T2BV2 ] (601) ;

[T2BV3 ] (602) ;

[T2BV4 ] (603) ;

[T2BV5 ] (604) ;

[T2BV6 ] (605) ;

[T2BS1 ] (606) ;

[T2BS2 ] (607) ;

[T2BS3 ] (608) ;

[T2BS4 ] (609) ;

[T2BS5 ] (610) ;

[T2BS6 ] (611) ;

[T2BP1 ] (612) ;

[T2BP2 ] (613) ;

[T2BP3 ] (614) ;

[T2BP4 ] (615) ;

[T2BP5 ] (616) ;

[T2BP6 ] (617) ;

[T2VV1 ] (618) ;

[T2VV2 ] (619) ;

[T2VV3 ] (620) ;

[T2VV4 ] (621) ;

[T2VV5 ] (622) ;

[T2VV6 ] (623) ;

[T2VS1 ] (624) ;

[T2VS2 ] (625) ;

[T2VS3 ] (626) ;

[T2VS4 ] (627) ;

[T2VS5 ] (628) ;

[T2VS6 ] (629) ;

[T2VP1 ] (630) ;

[T2VP2 ] (631) ;

[T2VP3 ] (632) ;

[T2VP4 ] (633) ;

[T2VP5 ] (634) ;

[T2VP6 ] (635) ;

[T3BV1 ] (600) ;

[T3BV2 ] (601) ;

[T3BV3 ] (602) ;

[T3BV4 ] (603) ;

[T3BV5 ] (604) ;

[T3BV6 ] (605) ;

[T3BS1 ] (606) ;

[T3BS2 ] (607) ;

[T3BS3 ] (608) ;

[T3BS4 ] (609) ;

[T3BS5 ] (610) ;

[T3BS6 ] (611) ;

[T3BP1 ] (612) ;

[T3BP2 ] (613) ;

[T3BP3 ] (614) ;

[T3BP4 ] (615) ;

[T3BP5 ] ( 616);

[T3BP6 ] ( 617);

[T3VV1 ] ( 618);

[T3VV2 ] ( 619);

[T3VV3 ] ( 620);

[T3VV4 ] ( 621);

[T3VV5 ] ( 622);

[T3VV6 ] ( 623);

[T3VS1 ] ( 624);

[T3VS2 ] ( 625);

[T3VS3 ] ( 626);

[T3VS4 ] ( 627);

[T3VS5 ] ( 628);

[T3VS6 ] ( 629);

[T3VP1 ] ( 630);

[T3VP2 ] ( 631);

[T3VP3 ] ( 632);

[T3VP4 ] ( 633);

[T3VP5 ] ( 634);

[T3VP6 ] ( 635);

OUTPUT: TECH1; stdyx; mod;

**Section 4.J: Mplus Syntax for construct validity Relating 6 Bully/Victim factors to Relevant Factors**

(172 items, 32 latent factors divided into 11 sets such that the multiple factors from the same instrument were treated as separate sets)

TITLE: Bully 32-factor CFA;

DATA: FILE is BULLYW1_V179_n3538_30MAR2010_SABULLYW1VAR179_30MAR2010.SAv.dat;

VARIABLE: NAMES ARE

T1bulv1 T1bulv2 T1bulv3 T1bulv4 T1bulv5 T1bulv6

T1buls1 T1buls2 T1buls3 T1buls4 T1buls5 T1buls6

T1bulp1 T1bulp2 T1bulp3 T1bulp4 T1bulp5 T1bulp6

T1vicv1 T1vicv2 T1vicv3 T1vicv4 T1vicv5 T1vicv6

T1vics1 T1vics2 T1vics3 T1vics4 T1vics5 T1vics6

T1vicp1 T1vicp2 T1vicp3 T1vicp4 T1vicp5 T1vicp6

T1PrARf1 T1PrARf2 T1PrARf3 T1PrARf4 T1PrARf5 T1PrARf6

T1PrADv1 T1PrADv2 T1PrADv3 T1PrADv4 T1PrADv5 T1PrADv6

T1PrPRf1 T1PrPRf2 T1PrPRf3 T1PrPRf4 T1PrPRf5 T1PrPRf6

T1prIGN1 T1prIGN2 T1prIGN3 T1prIGN4 T1prIGN5 T1prIGN6

T1cpAVd1 T1cpAVd2 T1cpAVd3 T1cpAVd4 T1cpAVd5 T1cpAVd6

T1cpPRs1 T1cpPRs2 T1cpPRs3 T1cpPRs4 T1cpPRs5

T1cpSS1 T1cpSS2 T1cpSS3 T1cpSS4

T1ATTPB1 T1ATTPB2 T1ATTPB3 T1ATTPB4 T1ATTPB5 T1ATTPB6

T1ATTPV1 T1ATTPV2 T1ATTPV3 T1ATTPV4 T1ATTPV5 T1ATTPV6

T1LOCIN1 T1LOCIN2 T1LOCIN3 T1LOCIN4

T1LOCEX1 T1LOCEX2 T1LOCEX3 T1LOCEX4

T1ANGCN1 T1ANGCN2 T1ANGCN3 T1ANGCN4

T1ANGIN1 T1ANGIN2 T1ANGIN3 T1ANGIN4

T1ANGEX1 T1ANGEX2 T1ANGEX3 T1ANGEX4

T1CDI1 T1CDI2 T1CDI3 T1CDI4 T1CDI5 T1CDI6 T1CDI7 T1CDI8 T1CDI9 T1CDI10

T1SCPh1 T1SCPh2 T1SCPh3 T1SCPh4

T1SCAp1 T1SCAp2 T1SCAp3 T1SCAp4

T1SCOP1 T1SCOP2 T1SCOP3 T1SCOP4

T1SCSM1 T1SCSM2 T1SCSM3 T1SCSM4 T1SCSM5

T1SCPR1 T1SCPR2 T1SCPR3 T1SCPR4

T1SCHN1 T1SCHN2 T1SCHN3 T1SCHN4 T1SCHN5 T1SCHN6

T1SCEM1 T1SCEM2 T1SCEM3 T1SCEM4 T1SCEM5

T1SCGN1 T1SCGN2 T1SCGN3 T1SCGN4 T1SCGN5 T1SCGN6

T1SCMA1 T1SCMA2 T1SCMA3 T1SCMA4

T1SCVB1 T1SCVB2 T1SCVB3 T1SCVB4 T1SCVB5

T1SCAC1 T1SCAC2 T1SCAC3 T1SCAC4

nsex nyr Znsex Znyr ryrsq ryrxsex ryr2xsex Nidwave1 t1levto t1lebot;

USEVARIABLES ARE

T1bulv1-T1SCAC4 Znsex Znyr ryrsq ryrxsex;

! nsex nyr Znsex Znyr ryrsq ryrxsex ryr2xsex;

MISSING are all (-999);

ANALYSIS:

ROTATION=geomin (OBLIQUE, .5); ESTIMATOR=MLR;

PROCESSORS = 4;

MODEL: ! Wave 1

bul1-bul3 by T1bulv1- T1bulp6 (*1);

vic1-vic3 by T1vicv1-T1vicp6 (*2);

Part1-Part4 by T1PrARf1-T1prIGN6 (*3);

COPE1-COPe3 by T1cpAVd1-T1cpSS4 (*4);

ATTD1-ATTD2 by T1ATTPB1-T1ATTPV6 (*5);

LOC1-LOC2 by T1LOCIN1-T1LOCEX4 (*6);

ANGER1-ANGER3 by T1ANGCN1-T1ANGEX3 T1ANGEX4 (*7);

CDI by T1CDI1-T1CDI10 (*8);

SDQ1-SDQ8 by T1SCPh1-T1SCGN6 (*9);

SDQ9-SDQ11 by T1SCMA1-T1SCAC4 (*10);

bul1-sdq11 with Znsex Znyr ryrsq ryrxsex;

Znsex with Znyr ryrsq ryrxsex ;Znyr with ryrsq ryrxsex ;ryrsq with ryrxsex ;

!bul1-SDQ11 with nsex nyr Znsex Znyr ryrsq ryrxsex ryr2xsex;

OUTPUT: TECH1 tech4 STDYX MODINDICES;! (ALL);

**References**

(Note References listed with an * also appear in the published article)

*Browne, M. W. (2001). An overview of analytic rotation in exploratory factor analysis. *Multivariate Behavioral Research*, *36*, 111-150.

Campbell, D. T., & Fiske, D. W. (1959). Convergent and discriminant validation by the multitrait-multimethod matrix. *Psychological Bulletin*, *56*(2), 81-105. doi:10.1037/h0046016

*Campbell, D. T., & O'Connell, E. J. (1967). Methods factors in multitrait-multimethod matrices: Multiplicative rather than additive? *Multivariate Behavioral Research, 2*(4), 409-426. doi:10.1207/s15327906mbr0204_1

Chen, F. F. (2007). Sensitivity of goodness of fit indexes to lack of measurement invariance. Structural Equation Modeling: *A Multidisciplinary Journal, 14*, 464-504.

Cheung, G. W., & Rensvold, R. B. (2002). Evaluating goodness-of-fit indexes for testing measurement invariance*. Structural Equation Modeling: A Multidisciplinary Journal, 9,* 233-255.

Hayashi, K., & Marcoulides, G. A. (2006). Identification issues in factor analysis. *Structural Equation Modeling, 13*(4), 631-645.

Hu, L., & Bentler, P. M. (1999). Cutoff criteria for fit indices in covariance structure analysis: Conventional criteria versus new alternatives. Structural Equation Modeling: *A Multidisciplinary Journal, 6,* 1-55 .

Jennrich, R.I. & Sampson (1966). Rotation to simple loadings. *Psychometrika, 31*, 313-323.

Jöreskog, K. G. (1969). A general approach to confirmatory maximum likelihood factor analysis. *Psychometrika, 34*, 183–202.

Marsh, H. W. (1988). Multitrait multimethod analysis. In J P. Keeves (Ed.), *Educational research methodology, measurement and evaluation: An international handbook* (pp. 570-580). Oxford: Pergamon Press.

Marsh, H. W. (1993). Multitrait-multimethod analyses: Inferring each trait-method combination with multiple indicators. *Applied Measurement in Education, 6*(1), 49-81. doi:10.1207/s15324818ame0601_4

Marsh, H. W., Balla, J. R., & McDonald, R. P. (1988). Goodness-of-fit indexes in confirmatory factor analysis: The effect of sample size. *Psychological Bulletin, 103*, 391-410.

Marsh, H. W., Craven, R. G., Parker, P. D., Parada, R. H., Guo, J., Dicke, T., & Abduljabbar, A. S. (2016). Temporal ordering effects of adolescent depression, relational aggression, and victimization over six waves: Fully latent reciprocal effects models. Developmental Psychology, 52(12), 1994-2009. doi:10.1037/dev0000241

Marsh, H. W., Ellis, L., Parada, L., Richards, G. & Heubeck, B. G. (2005). A short version of the Self Description Questionnaire II: Operationalizing criteria for short-form evaluation with new applications of confirmatory factor analyses. *Psychological Assessment, 17,* 81-102.Marsh, et al., 2005;

Marsh, H. W., & Grayson, D. (1995). Latent-variable models of multitrait-multimethod data. In R. H. Hoyle (Ed.), Structural equation modeling: Issues and applications (pp. 177-198). Thousand Oaks: Sage.

*Marsh, H. W., & Hau, K-T. (1996). Assessing goodness of fit: Is parsimony always desirable? *Journal of Experimental Education, 64*, 364-390.

Marsh, H. W. & Hocevar, D. (1988). A new, more powerful approach to multitrait-multimethod analyses: Application of 2nd-order confirmatory factor analysis. *Journal of Applied Psychology, 73*, 107-111.

Marsh, H. W., Hau, K. T., & Wen, Z. (2004). In search of golden rules: Comment on hypothesis testing approaches to setting cutoff values for fit indexes and dangers in over-generalizing Hu & Bentler’s (1999) findings. Structural Equation Modeling: *A Multidisciplinary Journal, 11,* 320-341.

*Marsh, H. W., Lüdtke, O., Nagengast, B., Morin, A. J. S., & Von Davier, M. (2013). Why Item Parcels Are (Almost) Never Appropriate: Two Wrongs Do Not Make a Right—Camouflaging Misspecification With Item Parcels in CFA Models. *Psychological Methods.* Advance online publication. doi:[10.1037/a0032773](http://psycnet.apa.org/doi/10.1037/a0032773)

*Marsh, H. W., Lüdtke, O., Nagengast, B., Trautwein, U., Abduljabbar, A. S. (2015). [Dimensional Comparison Theory: Paradoxical relations between self-beliefs and achievements in multiple domains](http://scholar.google.com.au/citations?view_op=view_citation&hl=en&user=oqYWxWwAAAAJ&sortby=pubdate&citation_for_view=oqYWxWwAAAAJ:i_7YvbSbtFEC). *Learning and Instruction, 35*, 16-32

Marsh, H. W., Martin, A. J. & Jackson, S. (2010). Introducing A short version of the Physical Self Description Questionnaire: New strategies, short-form evaluative criteria, and applications of factor analyses. *Journal of Sport & Exercise Psychology,32*, 438-482.

Marsh, H. W.; Martin, A. J.; Yeung, A. S. & Craven, R. G. (2017). In Elliot, Andrew J. (Ed); Dweck, Carol S. (Ed) & Yeager, David S. (Ed). *Handbook of competence and motivation: Theory and application,* 2nd ed. (pp. 85-115). New York, NY, US: Guilford Press, xiv, 722 pp.

*Marsh, H.W., Morin, A.J.S., Parker, P., & Kaur, G. (2014). Exploratory Structural Equation Modeling: An Integration of the best Features of Exploratory and Confirmatory Factor Analysis. *Annual Review of Clinical Psychology*, 10, 85-110

*Marsh, H. W., Muthén, B., Asparouhov. T., Lüdtke, O., Robitzsch, A., Morin, A. J. S., & Trautwein, U. (2009). Exploratory structural equation modeling, integrating CFA and EFA: Application to students’ evaluations of university teaching. *Structural Equation Modeling: A Multidisciplinary Journal, 16,* 439-476.

*Marsh, H. W., Nagengast, B., Morin, A. J. S., Parada, R. H., Craven, R. G., & Hamilton, L. R. (2011). Construct validity of the multidimensional structure of bullying and victimization: An application of exploratory structural equation modeling. *Journal of Educational Psychology*, *103*, 701-732.

*Morin, A.J.S., Marsh, H.W., & Nagengast, B. (2013). Exploratory Structural Equation Modeling: An Introduction. In G.R. Hancock & R.O. Mueller (Eds.), *Structural Equation Modeling: A Second Course* (2nd Edition, pp. 395-436. Greewich, Connecticut : IAP.

Muthén, L. K., & Muthén, B. O. (2015). *Mplus user’s guide.* Los Angeles: Muthén & Muthén.

Silvey, S.D. (1970). *Statistical Inference.* Harmondsworth: Penguin Books.
